1 **Resolving transcriptional states and predicting lineages in the annelid *Capitella teleta* using**  
2 **single-cell RNAseq**

3

4 Abhinav Sur<sup>1</sup> and Néva P. Meyer<sup>2\*</sup>

5

6 <sup>1</sup>Unit on Cell Specification and Differentiation, National Institute of Child Health and Human  
7 Development (NICHD), Bethesda, Maryland, USA, 20814

8

9 <sup>2</sup>Department of Biology, Clark University, 950 Main Street, Worcester, Massachusetts, USA,  
10 01610.

11

12

13 [abhinav.sur@nih.gov](mailto:abhinav.sur@nih.gov)

14 [nmeyer@clarku.edu](mailto:nmeyer@clarku.edu)

15

16 \*Corresponding author

17

18

19

20

21 **Keywords:** neurogenesis, single-cell RNAseq, annelid, cell type, differentiation trajectory,  
22 pseudotime, RNA velocity, gene regulatory network.

23

24 **Abstract**

25 Evolution and diversification of cell types has contributed to animal evolution. However, gene  
26 regulatory mechanisms underlying cell fate acquisition during development remains largely  
27 uncharacterized in spiralian. Here we use a whole-organism, single-cell transcriptomic approach  
28 to map larval cell types in the annelid *Capitella teleta* at 24- and 48-hours post gastrulation  
29 (stages 4 and 5). We identified eight unique cell clusters (undifferentiated precursors, ectoderm,  
30 muscle, ciliary-band, gut, neurons, neurosecretory cells and protonephridia), thus helping to  
31 identify previously uncharacterized molecular signatures such as novel neurosecretory cell  
32 markers. Analysis of core regulatory programs in individual clusters revealed gene interactions that  
33 can be used for comparisons of cell types across taxa. We examined the neural and  
34 neurosecretory clusters more deeply and characterized a differentiation trajectory starting from  
35 dividing precursors to neurons using Monocle3 and velocyto. Pseudotime analysis along this  
36 trajectory identified temporally-distinct cell states undergoing progressive gene expression  
37 changes over time. Our data revealed two potentially distinct neural differentiation trajectories  
38 including an early trajectory for brain neurosecretory cells. This work provides a valuable  
39 resource for future functional investigations to better understanding neurogenesis and the  
40 transitions from neural precursors to neurons in an annelid.

41

42

43

44

45

46

## 47 **Introduction**

48           Proper development of multicellular organisms relies on precise regulation of the cell  
49 cycle relative to establishment of cell lineages and cell fate decisions, e.g., the maintenance of  
50 proliferating cells versus the onset of differentiation. In general, many embryonic and  
51 postembryonic tissues are generated by stem cells that give rise to multipotent precursor cells  
52 whose daughters differentiate into tissue-specific, specialized cell types. Cell fate acquisition and  
53 differentiation are directly regulated by changes in transcriptional gene regulation. Therefore,  
54 understanding the underlying transcriptional dynamics is of utmost importance to understand  
55 developmental processes. Furthermore, alterations in gene regulatory networks (GRNs) may  
56 have driven diversification of cell types during animal evolution. According to Arendt (2016),  
57 cell types are evolutionary units that can undergo evolutionary change. Therefore, to identify  
58 related cell types across taxa, it is necessary to compare genomic information, such as shared  
59 gene expression profiles or shared enhancers across individual cells from specific developmental  
60 regions and stages.

61           More recently, single-cell RNA sequencing (scRNAseq) has emerged as a powerful  
62 technique to understand the genome-wide transcriptomic landscapes of different cell types (Tang  
63 et al., 2010; Hashimshony et al., 2012; Saliba et al., 2014; Trapnell et al., 2014b; Achim et al.,  
64 2015; Satija et al., 2015; Kaia Achim, 2017; Vergara et al., 2017; Svensson et al., 2018; Zhong et  
65 al., 2018). scRNAseq enables massively parallel sequencing of transcriptomic libraries prepared  
66 from thousands of individual cells and allows for *in silico* identification and characterization of  
67 distinct cell populations (Trapnell, 2015; Tanay and Regev, 2017). It can therefore provide  
68 information regarding the various cell types that emerge during developmental processes (e.g.  
69 neurogenesis) and elucidate how the transcriptomic landscape changes within stem cells and

70 their progeny as development progresses. As scRNAseq analysis algorithms allow for *a priori*  
71 identification of individual cells within a population, one can process heterogenous cell  
72 populations and unravel the transcriptomic signatures underlying such heterogeneity. This allows  
73 for discovery of novel cell types and resolution of the transcriptional changes throughout a single  
74 cell type's developmental journey. Emergence of this technology has therefore made it possible  
75 to predict molecular trajectories that underlie cell fate specification by sampling across a large  
76 number of cells during development and connecting transcriptomes of cells that have similar  
77 gene expression profiles (Farrell et al., 2018). Such approaches have recently gained prominence  
78 in evolutionary developmental biology and are being used to understand evolutionary  
79 relationships between cell types across taxa. This has paved the way to systemic molecular  
80 characterization of cell types and developmental regulatory mechanisms in understudied  
81 metazoan lineages.

82         Although whole-organism scRNAseq approaches have been used to unravel cell type  
83 repertoires in animal clades outside and across Bilateria (Kaia Achim, 2017; Farrell et al., 2018;  
84 Plass et al., 2018; Sebe-Pedros et al., 2018a; Sebe-Pedros et al., 2018b; Foster et al., 2020), there  
85 has been limited systemic information regarding cell type diversity and regulatory mechanisms  
86 underlying differentiation trajectories in the third major clade Spiralia  
87 ( $\approx$ Lophotrochozoa)(Marletaz et al., 2019). Whole-body scRNAseq has been performed on a few  
88 spiralian such as the planarian *Schmidtea mediterranea* (Cao et al., 2017; Plass et al., 2018) and  
89 the annelid *Platynereis dumerilii* (Achim et al., 2015; Kaia Achim, 2017). In *S. mediterranea*,  
90 different classes of neoblasts and various differentiation trajectories emanating from a central  
91 neoblast population were detected using whole-body scRNAseq (Plass et al. 2018). In *P.*  
92 *dumerilii* larvae, whole-body scRNAseq yielded five differentiated states — anterior neural

93 domain, gut, ciliary-bands, an unknown cell population and muscles (Kaia Achim, 2017).  
94 Similar transcriptomic information from other spiralian taxa can provide insight into conserved  
95 cell types and their evolution.

96 In this manuscript, we used scRNAseq to characterize larval cell types at 24- and 48-  
97 hours post gastrulation in the annelid *Capitella teleta* (Blake A. J, 2009)(Fig. 1), highlighting  
98 potential genetic regulatory modules and differentiation trajectories underlying different cell  
99 types. We (i) classified the captured cells into several molecular domains, (ii) predicted lineage  
100 relationships between neural cells in an unbiased manner, and (iii) identified neurogenic gene  
101 regulatory modules comprising genes that are likely involved in programming neural lineages.  
102 We compared larval cell types identified in this study with those in *P. dumerilii* at roughly  
103 similar stages during development. This study provides a valuable resource of transcriptionally  
104 distinct cell types during *C. teleta* larval development and illuminates the use of scRNAseq  
105 approaches for understanding molecular mechanisms of larval development in other previously  
106 understudied invertebrates.

107

## 108 **Materials and Methods**

109 For the data reported here, cell dissociation and scRNAseq using the 10X genomics  
110 platform was performed at the Single-cell Sequencing Core at Boston University, Boston,  
111 Massachusetts. We tried replicating the 10X experiment at the Bauer Sequencing Core, Harvard  
112 University; however, that run did not yield enough RNA for amplification and sequencing.

113

### 114 ***Capitella teleta* cell dissociation and single-cell suspension**

115 Total number of cells in *C. teleta* larvae at stages 4 and 5 were estimated by counting  
116 Hoescht-labeled nuclei in the episphere at stages 4–5 (Fig. S1A, B) and from previously  
117 collected cells counts in the trunk at stages 4 and 5 (Sur et al., 2020). At both stages, the  
118 episphere was divided into 10  $\mu\text{m}$  thick z-stacks and Hoescht<sup>+</sup> nuclei were counted in each z-stack  
119 using the Cell Counter plugin in Fiji. At stage 4, Hoescht<sup>+</sup> nuclei in the unsegmented trunk were  
120 counted within the presumptive neuroectoderm using a strategy previously described. Once the  
121 trunk neuroectoderm becomes segmented by stage 5, Hoescht<sup>+</sup> nuclei were counted in segments  
122 2–4 and 5–7 within specific region of interests (Sur et al., 2020). We also optimized cell-  
123 dissociation protocols in *C. teleta* (final protocol detailed below). Based on cell-dissociation  
124 trials using three different proteolytic enzymes (papain, trypsin and pronase), we found 1%  
125 papain yielded the highest number of dissociated cells but also led to a lower proportion of viable  
126 cells (Fig. S1C). Cell counts were estimated after mechanical and proteolytic digestion, size-  
127 exclusion of  $>40 \mu\text{m}$  cells or cell-clumps, and three washes in artificial seawater or cell-media  
128 (see below). Papain does not readily dissolve in seawater and hence needs to be resuspended in  
129 dimethylformamide or dimethyl sulfoxide, which may have an adverse effect on the viability of  
130 the dissociated cells. Cell dissociation using 1% Trypsin yielded the greatest number of viable  
131 cells and was used to dissociate *C. teleta* cells for scRNAseq (Fig. S1C).

132 Next, for collecting high-quality starting material for scRNAseq, healthy males and  
133 females were mated under controlled conditions and their offspring collected at the gastrula stage  
134 (stage 3) (Seaver et al., 2005; Sur et al., 2017). Stage 4 and stage 5 larvae were collected from  
135 two different sets of parents, each from a single mother. *Capitella teleta* embryos and larvae  
136 were incubated in artificial seawater (ASW) with 50  $\mu\text{g}/\text{mL}$  penicillin and 60  $\mu\text{g}/\text{mL}$   
137 streptomycin at 19 °C for 1–2 days until they reached stage 4 prototroch or stage 5 (Fig. 1). For

138 single-cell dissociation, 300 larvae from a single brood (i.e. from one male and female) for each  
139 stage were then collected into 1.5 mL centrifuge tubes and equilibrated in  $\text{Ca}^{2+}/\text{Mg}^{2+}$ -free ASW  
140 (CMFSW). Most of the CMFSW was removed from the tubes, and larvae were mechanically  
141 homogenized using separate, clean and sterile pestles as well as a hand-held homogenizer (Cole  
142 Parmer, LabGEN 7B) for 5–10 seconds. Homogenized larvae from each stage were then  
143 incubated in 1% Trypsin (SigmaAldrich, Cat# T4799-5G) in CMFSW for 30 minutes at room  
144 temperature with constant rocking. During incubation, dissociated tissues were periodically  
145 triturated using both wide-mouthed and narrow-mouthed Pasteur pipettes. After 30 minutes of  
146 incubation, the tissue lysate was passed through a 40  $\mu\text{m}$  nylon cell-strainer (Fisherbrand, Cat#  
147 22-363-547) to get rid of undissociated cell-clumps. The resultant cell-suspension was then  
148 centrifuged at 1100 x g for 7 minutes with slow-braking and washed twice in cell media that was  
149 developed originally for marine hemichordate cell-cultures (3.3X Dulbecco's PBS and 20 mM  
150 HEPES, pH = 7.4; Paul Bump, Lowe lab, personal communication). Dissociated cells were then  
151 resuspended in the cell media and checked under an inverted phase-contrast microscope to  
152 ensure a single-cell suspension was obtained.

153 Cells were counted using a Neubauer hemocytometer, and survivability was assayed  
154 using a Trypan blue exclusion test. Cells were observed under the 20X objective of a Zeiss  
155 AxioObserver-5 inverted microscope following Trypan-blue staining available at the Boston  
156 University Single-Cell Sequencing Core to ensure cell viability prior to droplet generation.  
157 Previous practice dissociations of *C. teleta* larvae and visual inspection using a Zeiss M2  
158 microscope at 40X resolution revealed dissociated cells ranging from 2–12  $\mu\text{m}$  in diameter (Fig.  
159 1). Due to the small size of *C. teleta* cells and the unavailability of a high-resolution microscope,  
160 the total number of cells dissociated in the cell-suspension could not be quantified confidently at

161 Boston University. Therefore, based on cell counts using the Zeiss AxioObserver-5 inverted  
162 microscope under the 20X objective, cells were diluted to a target of 400 cells/ $\mu$ L. However, due  
163 to our inability to accurately quantify cells and based on results from previous dissociation trials  
164 and total number of cells estimated per stage 4 and 5 larvae, our final cell suspension may have  
165 contained in the range of ~4000 cells/ $\mu$ L for stage 4 and ~2000 cells/ $\mu$ L for stage 5. A total of 15  
166  $\mu$ L of the resuspended cell-suspension was used for droplet generation estimating a 67%  
167 efficiency in droplet capture as per 10X genomics standard guidelines.

168

### 169 **Cell capture and sequencing**

170 *C. teleta* larval cells were captured in droplets and run on the 10X genomics scRNAseq  
171 platform at the Boston University Single Cell Sequencing Core following the manufacturer's  
172 instructions (Single Cell 3' v3 kit). The cDNA library and final library after index preparation  
173 were checked with bioanalyzer (High Sensitivity DNA reagents, Agilent Technology #5067-  
174 4626; Agilent 2100 Bioanalyzer) for quality control (Fig. S1D). Following library preparation,  
175 sequencing was performed with paired-end sequencing of 150 bp each end on four lanes of  
176 NextSeq500 per sample using the Illumina NextSeq500 High-Output v2 kit generating ~573  
177 million reads in total.

178 To rectify our inability to control the number of cells input in the first trial, we repeated  
179 the cell dissociation and cell-capture procedures at the Bauer Sequencing Core, Harvard  
180 University. In this trial, we carefully counted and diluted cells to 400 cells/ $\mu$ L under a Zeiss M2  
181 microscope using a 40X objective and loaded 15  $\mu$ L of the resuspended cell-suspension aiming  
182 to capture ~4000 cells per stage estimating a 67% efficiency in droplet capture as per 10X  
183 genomics standard guidelines. However, in this second trial, ~4000 captured cells did not



184 generate sufficient cDNA yield following whole transcriptome amplification to enable library  
185 preparation for sequencing (Fig. S1E). This indicates that our first 10X genomics trial at Boston  
186 University probably represents the best quality output possible using the 10X genomics  
187 scRNAseq platform on *Capitella teleta* larval cells.

188

### 189 **Bioinformatic processing of raw sequencing data**

190 Transcriptome sequencing analysis and read mapping were performed using CellRanger  
191 2.1.0 according to the manufacturer's guidelines. Reads were mapped onto the *Capitella teleta*  
192 genome v1.0 obtained from gene-models deposited at GenBank  
193 (GCA\_000328365.1\_Capca1\_genomic.fasta;  
194 [https://www.ncbi.nlm.nih.gov/assembly/GCA\\_000328365.1/](https://www.ncbi.nlm.nih.gov/assembly/GCA_000328365.1/)) and Ensembl  
195 (Capitella\_teleta.Capitella\_teleta\_v1.0.dna\_sm.toplevel.fa;  
196 [ftp://ftp.ensemblgenomes.org/pub/metazoa/release-46/fastacapitella\\_teleta](ftp://ftp.ensemblgenomes.org/pub/metazoa/release-46/fastacapitella_teleta)) using standard  
197 CellRanger parameters. The gene annotation files (.gff) files were downloaded from the  
198 respective genome databases. However, as CellRanger cannot read .gff files, each .gff file was  
199 converted into .gtf files using the gffread command from the cufflinks package ([http://cole-](http://cole-trapnell-lab.github.io/cufflinks/file_formats/)  
200 [trapnell-lab.github.io/cufflinks/file\\_formats/](http://cole-trapnell-lab.github.io/cufflinks/file_formats/)). Read mapping to the *Capitella teleta* genome v1.0  
201 was visualized using the IGV 2.8.0 viewer. Mapping of the sequence reads to both Ensembl and  
202 GenBank sequences yielded similar results. CellRanger generated a Digital Gene Expression  
203 (DGE) matrix with genes as rows and cells as columns where paired-end reads, one containing  
204 the cellular and molecular barcodes (Unique molecular identifiers, UMIs) and the other  
205 containing the captured RNA fragment, were joined together in a .bam file and sorted using  
206 samtools. Reads already tagged with the cell and molecular barcodes (UMIs) were further

207 trimmed at the 5' end to remove Illumina-specific sequencing adapter sequences and at the 3'  
208 end to remove poly-A tails using CellRanger default parameters.

209

## 210 **Gene annotation**

211 To annotate the genes from the two versions of the *C. teleta* genome (Simakov et al.,  
212 2013), reciprocal BLAST comparison of individual gene sequences against the Swiss-Prot  
213 database was performed. For each transcript, the BLAST hit with the highest E-value was  
214 selected for annotation. The translated reference transcriptome along with the *C. teleta* gene-  
215 models were scanned using the HMMER suite 3.3 program hmmscan using default settings.  
216 Using HMMER and Pfam v31.0 database, protein domains in the *C. teleta* transcriptome were  
217 identified (Finn et al., 2016).

218

## 219 **Gene and cell filtering: Quality control and clustering analysis**

220 DGE matrices were analyzed using the R package Seurat 3.1.4 (Satija et al., 2015).  
221 Because of our inability to control the number of cells that were used for droplet generation, and  
222 to understand cell-state specific gene and UMI metrics, we performed an initial cluster analysis  
223 using less stringent gene and UMI cutoffs. Initially, gene per cell cutoffs between >200 and  
224 <3000 and UMI per cell cutoffs of >200 and <4000 were set. Genes that were expressed in at  
225 least three cells were kept and cells that had more than 5% mitochondrial reads were excluded.  
226 High mitochondrial content may indicate that a cell was stressed or dying. However, using such  
227 cutoffs, not enough unique cell clusters were detected. This may be because particular cell-  
228 doublet categories were not excluded in the cut-off selection. Therefore, this preliminary analysis

229 led us to increase the gene per cell cutoffs to >300 and <2500 in order to prevent the inclusion of  
230 cell-doublings in our analysis.

231 We refined our gene/UMI cutoffs, and only genes that were expressed in at least three  
232 cells with a minimum of 300 genes were included in the analysis. Moreover, we also discarded  
233 cells with more than 2500 genes in sequences obtained from both samples in order to screen out  
234 cell-doublings. A total of 9487 genes across 1072 cells for stage 4 and 13403 genes across 1785  
235 cells for stage 5 from one 10X genomics experiment were included in the final analysis. This  
236 accounts for around ~4 cells per stage 4 larva dissociated and ~6 cells per stage 5 larva  
237 dissociated that were bioinformatically recovered from initially loaded ~200 cells per larva for  
238 stage 4 and ~100 cells per larva loaded for stage 5. We only used 3.1% of Cell Ranger predicted  
239 captured cells for stage 4 and 10.86% of predicted captured cells at stage 5 for downstream  
240 analysis. UMI counts per gene in individual cells were normalized to the total UMI count of each  
241 cell using the ‘LogNormalize’ function with a scale factor of 10,000 (Fig. S2). Clustering  
242 analysis of the cells was done using the top 2000 variable genes identified using the  
243 ‘FindVariableFeatures’ function (selection.method = vst, nfeatures = 2000) (Fig. S2A, B).  
244 Following variable gene selection, data were then centered and scaled using the ‘Scale Data’  
245 function with default parameters. These variable genes were then used to perform a principal  
246 component analysis (PCA) on the scaled data. The top 15 PCs obtained were then tested for  
247 significance using a JackStraw test that is part of the Seurat 3.1.4 parlance with 100 replicates.  
248 Principal components (PCs) with a p-value of less than 1e-5 were used to perform a Louvain-  
249 based clustering on the shared nearest neighbor (SNN) graph (Fig. S2E, F). For data  
250 visualization, we performed t-distributed stochastic neighbor embedding (t-SNE) and Uniform  
251 Manifold Approximation and Projection (UMAP) analysis. Specific cell-clusters were detected

252 using the ‘FindClusters’ function from Seurat using a resolution of 0.5. Dendrograms depicting  
253 relationships between cell-clusters were generated using the ‘PlotClusterTree’ function.

254 Marker genes for individual clusters were identified using Seurat’s ‘FindAllMarkers’  
255 function calculated using the Wilcoxon’s rank sum test. Using this approach, cells from each  
256 population were compared against each of the other clusters in order to detect uniquely expressed  
257 genes. Only genes that were enriched and expressed in 25% of the cells in each population  
258 (min.pct = 2.5) and with a log fold difference larger than 0.25 (logfc.threshold = 0.25) were  
259 considered. These differentially expressed genes per cluster were plotted on the feature plot  
260 individually using the ‘FeaturePlot’ function in Seurat for visualization in either UMAP or t-SNE  
261 space. The results also were visualized in a heatmap generated using the ‘DoHeatMap’ function.

262

## 263 **SWNE analysis**

264 Apart from t-SNE and UMAP analysis, we also performed similarly weighted non-  
265 negative embedding (SWNE) analysis for visualizing high-dimensional single-cell gene  
266 expression datasets for each of our samples. SWNE captures both local and global structure in  
267 the data unlike t-SNE and UMAP embeddings, while enabling genes and biological factors that  
268 separate cell types to be embedded directly onto the visualization. To perform the SWNE  
269 analysis, a previously published R-based SWNE framework was used (Wu et al., 2018). The  
270 analysis was performed on log-normalized read count data for a set of variable genes from a  
271 previously generated Seurat object using the ‘RunSWNE’ function. Because the number of  
272 factor embeddings representative of the dataset cannot be estimated *a priori*, this parameter  
273 (called K) needs to be determined empirically. As the SWNE algorithm has the non-negative  
274 matrix factorization (NMF) inherently built into it, we initially performed NMF analysis over a

275 broad range of K values ranging from 2 to 60 with steps of 2. The outputs of these separate runs  
276 were compiled together in order to estimate the optimal K-value. To find the optimal number of  
277 factors to use, the ‘FindNumFactors’ function was used. The function iterates over multiple  
278 values of k and provides the optimal number of factors that best represent the dataset. Following  
279 that, the NMF decomposition was run using the ‘RunNMF’ function that generates an output of  
280 gene loadings (W) and NMF embeddings (H). Following the NMF analysis, the SWNE  
281 embedding was run using the parameters:  $\alpha.exp = 1.25$ ,  $snn.exp = 0.25$  and  $n\_pull = 3$  that  
282 control how the factors and neighboring cells affect the cell coordinates. The SWNE output was  
283 analyzed using the gene loadings matrix. Since NMF creates a part-based representation of the  
284 data, the factors often correspond to key biological processes or gene modules that explain the  
285 data. The top factors for each gene were visualized as a heat map using the ‘ggHeat’ function.

286

### 287 **Subclustering of neural cells**

288 The neural and neurosecretory clusters obtained in the stage 5 t-SNE plot were isolated  
289 from the differential gene expression matrix, and the previously described Seurat analysis was  
290 repeated with the clustering resolution set at 0.5.

291

### 292 **Monocle3 pseudotime analysis**

293 Pseudotime analysis of the neurogenic lineage was performed using the Bioconductor  
294 package Monocle3.0.2 (Trapnell et al., 2014b). For pseudotime analysis, the previously used  
295 Seurat object generated from the neural cell subcluster was imported into Monocle3. Monocle3  
296 was run on our normalized counts matrix for the subclustered neural dataset. The data was  
297 subject to UMAP dimensional reduction and cell clustering using the ‘cluster\_cells’ function

298 ('cluster\_cells': resolution=0.001). A principal graph was plotted through the UMAP coordinates  
299 using the 'learn\_graph' function that represents the path through neurogenesis. This principal  
300 graph was further used to order cells in pseudotime using the 'ordercells()' function in  
301 Monocle3. Following that, we identified the population of neural precursor cells (NPCs) based  
302 on expression of cell-cycle markers and re-ran 'ordercells()' with NPCs as the root cell state.  
303 Genes changing as a function of pseudotime along the principal graph were determined using  
304 'graph\_test' function. Cells and most differentially expressed genes were then plotted in  
305 pseudotime using default parameters in Monocle3. The most significantly expressed genes with  
306 the greatest q-values were plotted on a heatmap of expression over pseudotime using the  
307 'plot\_pseudotime\_heatmap' function in Monocle.

308

### 309 **RNA velocity estimation**

310 To calculate RNA velocity of single cells within the neural subcluster, we applied the  
311 velocity R (v0.6) package (La Manno et al., 2018). Velocity uses the mapped reads from  
312 CellRanger and counts the number of spliced and unspliced reads separately. As the CellRanger  
313 read-mapping algorithm is splice-sensitive, the RNA velocity analysis can very easily be applied  
314 on the .bam files generated by CellRanger. For our 10X output, counting was performed at the  
315 level of molecules, taking into consideration the annotation (spliced, unspliced etc.) of all reads  
316 associated with the molecule. A molecule was annotated as spliced, unspliced or ambiguous  
317 based on the following criteria: a molecule was considered spliced if all of the reads in the set  
318 mapped only to the exonic regions of the compatible transcripts whereas a molecule was called  
319 as unspliced if at least one of the supporting reads were found to span exon-intron boundaries or  
320 mapped to the intron of the transcript. Molecules for which some of the reads mapped

321 exclusively to the exons and some exclusively to the introns were categorized as “ambiguous”  
322 and not used for downstream analysis (La Manno et al., 2018). The command-line interface  
323 (CLI) for velocity R (v0.6) was run in permissive mode. In this setting, we only used the cells  
324 mapped to the transcriptome that were present in our final neural subclustering Seurat analysis.  
325 Using all cells from the stage 5 neural subcluster, we normalized the expression per cell and  
326 selected the top 2000 variable genes to perform a PCA. Using the first 15 principal components  
327 we performed a data imputation with a neighborhood of 200 cells ( $k = 200$  nearest neighbors)  
328 and calculated RNA velocities. All steps were performed using in-built parameters for fitting  
329 gene-models, predicting velocity, extrapolating and plotting. To visualize the plots, we used the  
330 t-SNE embedding as produced by the Seurat analysis.

331

## 332 **Results**

### 333 **Single-cell profiling of *C. teleta* stage 4 and 5 whole-body larvae**

334 To explore developmental trajectories and how transcriptomic landscapes across cells  
335 change during early larval development in the marine annelid *Capitella teleta*, we dissociated  
336 300 whole larvae from a single brood at both 24- and 48-hours post gastrulation, which  
337 corresponds to stage 4 just after appearance of the prototroch ciliary band, and stage 5,  
338 respectively. Based on Hoescht-labeled nuclei counts in the episphere and the trunk, we  
339 estimated that a stage 4 larva has ~2000 cells and a stage 5 larva has ~4000 cells (Fig. S1A, B).  
340 To enable random sampling of cells, we used 300 animals per stage to maximize the initial pool  
341 of cells for cell-capture. We also tested multiple methods of cell dissociation and examined cell  
342 survival rate (Fig. S1C). For scRNAseq, we dissociated cells in 1% trypsin for 30 minutes since  
343 this yielded the best survival rate (97%). However, due to the unavailability of a high-resolution

344 microscope at the genomics facility and the small size of *C. teleta* dissociated cells (2–12  $\mu\text{m}$ ),  
345 total number of cells could not be counted accurately (See Materials and Methods). Therefore,  
346 based on previous pilot cell-dissociation trials (Fig. S1C), the number of cells were roughly  
347 estimated in the dissociated cell-suspension. We intended to sequence ~4000 cells per stage but  
348 due to technical limitations, we estimate that a much higher concentration of cells (see Methods)  
349 was loaded into the droplet-based scRNAseq platform 10X Genomics Chromium (Fig. 1). After  
350 sequencing and read-mapping, CellRanger predicted to have recovered 34,592 cells with 7,251  
351 mean reads/cells from stage 4 and 16,434 cells with 17,837 mean reads/cell from stage 5 (Table  
352 S1). Based on our rough estimations, we recovered around 55% of the total number of cells input  
353 into the 10X Genomics system (~60,000 for stage 4 and ~30,000 for stage 5). However, there  
354 appeared to be a lot of noise due to the presence of cell-doublets and free-flowing RNA  
355 following cell-capture and sequencing. Hence, to identify distinct cell types from the stage 4 and  
356 5 single-cell datasets, the assembled reads were passed through stringent Seurat quality control  
357 and UMI filtering algorithms (Fig. S2). A second trial conducted with careful estimation of cell  
358 counts and capturing ~4000 cells/stage did not yield enough cDNA to make high quality  
359 sequencing libraries unlike the first trial (Fig. S1D, E). Following computational filtering of our  
360 dataset to remove low-complexity transcriptomes, lowly-expressed genes and transcriptome  
361 doublets, we bioinformatically recovered 1072 cells from 300 stage 4 larvae and 1785 cells from  
362 300 stage 5 larvae that were used for downstream analysis. Although we only captured a small  
363 fraction of cells after computational filtering, this is the first ever scRNAseq experiment on *C.*  
364 *teleta* larvae using the 10X genomics platform, and we were able to resolve some discrete  
365 transcriptional profiles and their underlying developmental trajectories.  
366



367 **Transcriptional cell states in stage 4 and 5 larvae**

368 To classify cell population identities in the global dataset across the two *C. teleta* larval  
369 stages, Seurat unsupervised clustering (Butler et al., 2018) of the aggregated data from stages 4  
370 and 5 was conducted. UMAP analysis revealed six computationally identified clusters with a  
371 tight group of cells (C0, C1, C3, C4, and C5) and one cell-population situated farther away (C2;  
372 Fig. 2A). As at stages 4 and 5, majority of the cells in the *C. teleta* body are undifferentiated, and  
373 these individual clusters likely represent distinct developmental trajectories through which cells  
374 are progressing. Undifferentiated cells expressing receptors of growth factors (e.g. *fgfr11*, *egf-like*  
375 *receptors*) and cell-cycle regulatory genes (e.g. *cdc6*, *mcmbp*, *cks1*; Fig. 2B, C) were found to be  
376 scattered across all cell clusters. In order to assign cluster identity, we used previously  
377 characterized genes in *C. teleta* and uncharacterized *C. teleta* genes homologous to known tissue  
378 markers in other taxa. Each cluster was identified based on the analysis of the top 30  
379 significantly enriched genes per cluster. Gene annotations are reported in Table S2.

380 Cluster C0 was enriched in genes predicted to be involved in extracellular matrix  
381 remodeling such as *protogenin-A*, *protocadherin fat-4*, tyrosine protein kinase *csk1*, *chaoptin* and  
382 *hepatocyte growth factor (hgf)*, indicating that these cells may be epidermal precursor cells (Fig.  
383 2B, C). Similarly, differentially expressed genes in the C1 cluster included *UDP-D-xylose:L-*  
384 *fucose alpha-1,3-D-xylosyltransferase 3 (rgxt3)*, *D-threonine aldolase (dta)*, a chitin-binding  
385 peritrophin-A domain containing protein, and vacuolar protein sorting-associated protein 51  
386 homolog (*vps51*) (Fig. 2B, C), all of which represent chitin-binding proteins and proteoglycans  
387 (Shen and Jacobs-Lorena, 1999); however, the exact identity of cells in this cluster remained  
388 unclear. The other clusters also had distinct expression profiles suggestive of specific identities,  
389 C2: ciliary bands + neural cells (*tekt4a*, *rsph1*, *Ct-elav1*, *Ct-syt1*) among others, C3: gut secretory

390 cells (*colq*, *Ct-blimp*, *glna2*, *enteric neuropeptides*), C4: myoblasts (*Ct-wnt2*, tetratricopeptide  
391 domain containing *unc45b*, F-box protein homolog *fbx22*, *vegfb*, *rer1*, *myosin heavy-chain*), and  
392 C5: protonephridia (*S-formylglutathione hydrolase*, *hercynylcysteine sulfoxide lyase* and  
393 *carbohydrate sulfotransferase 1*) (Fig. 2B–E). C3 also expressed some myogenic markers, albeit  
394 at a lower level (Fig. 2E), which could indicate that a subset of developing muscle precursors  
395 clustered here.

396 Interestingly, apart from C2, all other clusters expressed receptors for neurotransmitters  
397 and neurohormones (Fig. 2F). C5 (protonephridia) was found to express dopaminergic  
398 neuroreceptors (*drd5l*) and atrial-natriuretic peptide receptors (*anpra*) (Fig. 2F), while C3 was  
399 particularly enriched in receptors for neurotransmitters and neuropeptides/hormones like  
400 acetylcholine (*acm2* and *acha6*), GABA (*plcl2*), FMRF-amide (*fmar*), gonadotropin (*gnrr2*) and  
401 somatostatin (*ssr5*). Even though the C3 cluster contained cells that expressed neurotransmitter  
402 and neurohormone receptors, we think this cluster could largely contain gut and muscle cells  
403 based on expression of these types of receptors in these cell types in other taxa (Florey and  
404 Rathmayer, 1978; Walker et al., 1993; Terra et al., 2006; Crisp et al., 2010; Mirabeau and Joly,  
405 2013; Hung et al., 2020; Wu et al., 2020a). Receptors for acetylcholine, FMRF-amide and  
406 GABA have been reported to be localized to the body wall muscle in earthworms and leeches  
407 (Walker et al., 1993). Spiralian FMRF-amide G-protein coupled receptors (GPCRs) were first  
408 reported in *P. dumerilii* and were found to be homologous to insect neuropeptide receptors  
409 responsive to neuropeptide-F (Elphick et al., 2018). In *C. teleta*, FMRF-amide<sup>+</sup> neurons have  
410 been shown to be associated with the midgut (Meyer et al., 2015). Both glutamate and GABA  
411 signaling have been reported in midgut epithelial cells in insects (Terra et al., 2006; Hung et al.,  
412 2020). Somatostatin/allatostatin-C encodes for a neuropeptide family of hormones that are

413 expressed in *D. melanogaster* midgut endocrine cells (Wu et al., 2020a), while octopamine  
414 GPCRs have been reported in the annelid *P. dumerillii* and the priapulid *Priapulid caudatus*  
415 where they were shown to be activated in presence of dopamine, tyramine and octopamine  
416 ligands (Bauknecht and Jekely, 2017). Such neuropeptide- and neurotransmitter-signaling  
417 repertoires may regulate diverse behavioral changes associated with life-phase transitions in *C.*  
418 *teleta* based on previous evidence from *P. dumerillii* (Conzelmann et al., 2013).  
419 The neurotransmitter and neuropeptide receptors characterized in our dataset can also serve as a  
420 valuable resource for better understanding neurotransmitter and neuropeptide signaling in *C.*  
421 *teleta*.

422

### 423 **Overall molecular changes across *C. teleta* larval development**

424 An unsupervised graph-based clustering approach was used to separately analyze  
425 transcriptomic data at stages 4 and 5. Datasets were visualized with t-SNE dimensionality  
426 reduction (Fig. 2, Fig. 3A, Fig. 4A). In our stage 4 dataset, we detected ~174 median genes per  
427 cell and around ~740 median UMIs per cell, while in our stage 5 dataset, we detected ~241  
428 median genes per cell and ~1145 median UMIs per cell (Fig. S2, Table S1). At both stages 4 and  
429 5, t-SNE analysis revealed a large population of cells (C0; gray) that were enriched in ribosomal  
430 genes (RL10, RS9, RS4), cell proliferation markers (e.g. *pcna*), S-phase and M-phase cell-cycle  
431 markers (e.g. *cks1*, *mcm3*, *rfa3*, *wee1*) and chromatin remodeling genes (e.g. *acinu*, *bptf*),  
432 indicating that these cells are undifferentiated, developmental precursors (Fig. 3A, B, D, G, Fig.  
433 4A, B, Table S3, S4). Such a finding is expected as the *C. teleta* larval body at this stage largely  
434 comprises proliferative cells (Seaver et al., 2005; Sur et al., 2020). The C0 cluster may contain  
435 different subsets of precursors or stem cells that give rise to different tissues throughout *C. teleta*

436 development. Expression of *Ct-soxB1* in many of these cells indicates that at least a subset is  
437 ectodermal in origin (Fig. 3B, D, Fig. 4B, C). At stage 5 but not stage 4, some cells within C0  
438 were also found to express muscle-associated markers such as *hand2*, *troponinC* and *twitchin*  
439 (data not shown). Therefore, we generically named this cluster ‘precursors’. In both datasets, we  
440 detected a few C0 cells that expressed *Ct-piwil* and *Ct-hes2* (Fig. S3A, Fig. S5A). *Ct-piwil* has  
441 been characterized as a marker of both somatic and germline stem-cells in *C. teleta* (Giani et al.,  
442 2011), while *Ct-hes2* is a homolog of the vertebrate *hes1a* gene, which is a *Notch* target and  
443 regulates stem-cell maintenance and cell-cycle progression. *Ct-hes2* is broadly expressed in  
444 larvae, including in lateral ectoderm and the posterior growth zone where new segments are  
445 generated from stage 7 onward in *C. teleta* (Thamm and Seaver, 2008). C0 in both datasets  
446 comprises a complex set of cells that express markers representative of various tissues and may  
447 represent uncommitted cells with different developmental trajectories.

448 C1 in the stage 4 dataset and C2 in the stage 5 dataset primarily expressed markers  
449 associated with cellular tight junctions and extracellular matrix (e.g. *claudin*, *lamin a/c*, *annexin7*  
450 and *p4ha2*) as well as genes shared with C0 and the neural cluster (Fig. 3B, Fig. 4B, Fig. S3B,  
451 Fig. S5B). Lamin A/C and *p4ha2* have been identified in the epidermis of *P. dumerilii* and other  
452 spiralian (Kim et al., 2012; Kaia Achim, 2017). *Claudin* is a tetraspanning transmembrane  
453 protein that is an integral component of tight junctions (Krause et al., 2008; Piontek et al., 2008)  
454 while *annexin-7* has calcium-dependent membrane-binding activity in most animals. Finding  
455 shared expression of putative epidermal and neural markers could corroborate previous lineage  
456 tracing data suggesting that individual precursor cells in the neuroectoderm generate anywhere  
457 from one to 50 neural cells as well as one or two epidermal cells (Meyer and Seaver, 2009).  
458 Therefore, based on the expression of extracellular matrix remodeling genes and neural markers,

459 C1 in stage 4 and C2 in stage 5 was identified as “ectodermal precursor cells”. Cells in the C1  
460 cluster in the stage 5 dataset (Fig. 4A) expressed similar genes as in C1 of the aggregated dataset  
461 (Fig. 2A, B) such as *D-threonine aldolase (dta)* and vacuolar protein sorting-associated protein  
462 51 homolog (*vps51*) as a result of which its identity remained unclear.

463 In the stage 4 dataset, C2 represents ciliary-band cells that express homologs in the  
464 *dynein* family (*dyhc*, *dyhc2*, *dyh7*, *dyh5*, *dy13*, *hydin* etc.), radial spoke-head genes (*rsph1* and  
465 *rsph3*) and intraflagellar transport-proteins (*ift80*) associated with the axonemal apparatus of cilia  
466 (Fig. 3B, E, Fig. S3C), similar to *P. dumerilii* (Kaia Achim 2017). Moreover, these ciliary-band  
467 cells at stage 4 do not express any of the S-phase or M-phase markers indicating that these cells  
468 are not proliferating (Fig. 3B, G). *Hydin* encodes for a protein that constitutes the axonemal  
469 central-pair apparatus that regulates cilia motility while IFT80 constitute part of the molecular  
470 machinery underlying cilia motility. However, at stage 5, cells expressing these same ciliary  
471 markers were found to be scattered across all clusters and did not resolve as a distinct cluster  
472 (Fig. 4B, Fig. S5C).

473 C3 in the stage 4 dataset (Fig. 3A, B) and C5 in the stage 5 dataset (Fig. 4A, B) were  
474 identified as “gut” based on some of the highly expressed markers in that cell-cluster including  
475 peptidases (e.g. *antistatin*, *tyrosinase*), secretory proteins (e.g. *lipophilin*, *profilin*) and  
476 glycotransferases (e.g. *lrg2b* and *alg13*) (Fig. 3B, Fig. 4B). These cells were also found to  
477 express *hepatocyte nuclear factor 4a (hnf4a)*, *tetraspanin-11* and *collagen alpha* (Fig. 3B, D, E,  
478 Fig. 4B, C, Fig. S3D, Fig. S4D), which have been shown to be expressed in midgut cells in *P.*  
479 *dumerilii* (Kaia Achim 2017) and in digestive cells of the cnidarian *Nematostella vectensis*, the  
480 ctenophore *Mnemiopsis lyeidi* and the sponge *Amphimedon queenslandica* (Sebe-Pedros et al.,  
481 2018a; Sebe-Pedros et al., 2018b). However, *collagen alpha* expression was not detected in the

482 stage 5 “gut” cluster while *tetraspanin-11* was one of the most enriched genes in the C5 cluster  
483 of the stage 5 dataset (Fig. 4C). Interestingly, *Ct-gataB1*, which is expressed in endodermal cells  
484 at stage 4 in *C. teleta* and in the large, yolky midgut cells at later larval stages, was found to be  
485 excluded from the ‘gut’ cluster at stage 4 but not at stage 5 (Fig. S3D). However, at both stages,  
486 *hnf4a* and *Ct-gataB1* were expressed in a subset of cells in the C0 “precursors” clusters (Fig.  
487 S3D, Fig. S5D). Previous lineage tracing experiments identified a population of small, interstitial  
488 cells in the midgut of *C. teleta* larvae (Meyer et al., 2010), but the genes expressed in these  
489 interstitial midgut cells have not been characterized. Since the C3 cluster at stage 4 expresses  
490 digestive enzymes but not *Ct-gataB1*, these could represent interstitial midgut cells. At stage 5,  
491 the C5 cluster may include both *Ct-gataB1*<sup>+</sup> large, yolky midgut cells as well as interstitial  
492 midgut cells. One possible reason for the clustering of *Ct-gataB1*<sup>+</sup> cells among precursor cells at  
493 stage 4 may be because of the proliferative nature of early endodermal cells. As a result, our  
494 bioinformatic pipeline detected these *Ct-gataB1*<sup>+</sup> cells to be more similar to the dividing  
495 precursors than the C3 gut cells. At stage 5, the *Ct-gataB1*<sup>+</sup> cells may have a decreased  
496 proliferative potential and hence are clustered with the other ‘gut’ cells. However, this awaits  
497 further verification using cell proliferation assays and in-situ hybridization.

498 Lastly, the C4 cluster in the stage 4 dataset and C3 in the stage 5 dataset likely have a  
499 neural identity based on expression of neural differentiation markers such as *Ct-elav1*, *Ct-syt1*,  
500 *Ct-msi*, *Ct-neuroD* and *Ct-syt1* (Meyer and Seaver, 2009; Meyer et al., 2015; Sur et al.,  
501 2017)(Fig. 3B, D–F, Fig. 4B, C, Fig. S3F, G, Fig. S5F, G). S-phase markers were also expressed  
502 in the ‘neural’ cluster at stages 4 and 5 indicating that these may be dividing neural progenitors  
503 given their spatial proximity to *Ct-elav1*<sup>+</sup> and *Ct-syt1*<sup>+</sup> cells in the tSNE plot (Fig. 3B, D, Fig.  
504 4B, C, Fig. S3E, Fig. S5E). In the stage 4 dataset, a few cells in C1 were also found to express

505 some neural markers (e.g. *Ct-ngn*, *Ct-ash1*, *Ct-msi* and *Ct-elav1*) (Fig. 3D). At stages 4 and 5,  
506 previous work using whole-mount in situ hybridization found that *Ct-ngn* and *Ct-ash1* are  
507 expressed in neural precursor cells (NPCs) and dividing foregut precursor cells. *Ct-ash1* is also  
508 expressed weakly in dividing mesodermal precursor cells and in some ectodermal cells outside  
509 the neuroectoderm (Meyer and Seaver, 2009; Sur et al., 2017; Sur et al., 2020). Therefore, in the  
510 C1 cluster at stage 4, the *Ct-ngn*<sup>+</sup>/*Ct-ash1*<sup>+</sup> cells may be ectodermal precursors, NPCs, and/or  
511 foregut precursor cells, while *Ct-ngn*<sup>-</sup>/*Ct-ash1*<sup>+</sup> cells may be mesodermal precursor cells.  
512 Previous work has also shown that *Ct-msi*, *Ct-elav1* and *Ct-syt1* are exclusively expressed in  
513 differentiating and differentiated neurons (Meyer and Seaver, 2009; Meyer et al., 2015; Sur et  
514 al., 2017; Sur et al., 2020). Therefore, *Ct-elav1*<sup>+</sup>/*Ct-syt1*<sup>+</sup> cells in the C4 cluster at stage 4 are  
515 likely neurons, which first form in the developing brain and around the mouth (Meyer et al.,  
516 2015). At stage 5, the neural cells form a more coherent cluster C3, comprising NPCs expressing  
517 cell-cycle markers, intermediate differentiation states expressing *Ct-ngn*, *Ct-neuroD* and *Ct-*  
518 *ash1*, and mature neurons expressing *Ct-elav1*, *Ct-msi* and *Ct-syt1* (Fig. 4B, C; Fig. S5F, G). *Ct-*  
519 *elav1* and *Ct-syt1* were found to be more enriched and restricted to C3 in the stage 5 dataset  
520 unlike our observations at stage 4. At both stages we also observed the expression of *Ct-*  
521 *hunchback* in the neural cluster as previously reported in *Capitella* (Werbrock et al., 2001) and  
522 *P. dumerilii* (Kerner et al., 2006), and a homolog of MAP-kinase interacting serine/threonine  
523 kinase (*MKNKI*) in neural cells possibly indicating the involvement of the MAP-kinase signaling  
524 pathway during *C. teleta* neural development.

525 At stage 5, we also identified two additional discrete clusters from stage 4. C4 in the  
526 stage 5 dataset was classified as ‘neurosecretory’ based on the expression of markers genes such  
527 as the sodium- and chloride-dependent glycine transporter (*sc6a5*) and *synaptotagmin-4* (*syt4*)



528 and *secretogranin-V* (*scg5*) (Fig. 4B, C, Fig. S5G, H). Neurosecretory cells secrete neuropeptides  
529 or hormones in response to neural input. A few neurosecretory cells were also detected as early  
530 as stage 4, and these cells clustered within the neural cluster (C4) (Fig. 3B; Fig. S3G, H). These  
531 cells could represent neurosecretory brain centers, which have been previously reported in other  
532 annelids (Tessmar-Raible et al., 2007; Williams et al., 2017). The function of the *sc6a5* gene is  
533 to impart neurosecretory fate by inhibiting glycinergic neurotransmission. In addition, non-  
534 calcium binding members of the Synaptotagmin family (i.e. Syt4) and *Syt-alpha* are implicated  
535 in the generation of large, dense-core vesicles for neurosecretion and have been found to be  
536 highly expressed in neurosecretory cells (Moghadam and Jackson, 2013; Park et al., 2014).  
537 *Secretogranin-V* is a neuroendocrine precursor protein that regulates pituitary hormone secretion  
538 in mammals. Marker genes that characterize the neurosecretory cell-cluster (C4) are largely  
539 expressed within the neural cluster (C3) as well in the stage 5 dataset. A few unique genes  
540 expressed by the neurosecretory cells were *neuroendocrine convertase 2*, *prohormone*  
541 *convertase* (Fig. S5H), and *conopressin/neurophysin* (data not shown). Neurophysin has been  
542 characterized in the developing neurosecretory brain centers in the annelid *P. dumerilii* and  
543 zebrafish *D. rerio* (Tessmar-Raible et al., 2007). In addition to neurosecretory cells, we also  
544 identified a protonephridia cluster, C6, at stage 5 based on the expression of sulfotransferases  
545 involved in the urea-cycle, e.g., *uronyl sulfotransferase*, *UDP glucouronic acid decarboxylase*  
546 and *carbohydrate sulfotransferases* (Fig. 4B, C).

547 We further examined relationships between all cell-clusters using PlotClusterTree in  
548 Seurat as this better represents transcriptional similarities between clusters than t-SNE distance.  
549 We found that the neural cluster branches out first followed by the other non-neural cell-clusters  
550 (Fig. 3C). This further confirms that the neural tissue is the first to be specified during *C. teleta*



551 development and exhibits more transcriptional similarity to ectodermal precursor cells (C1) than  
552 any other cluster.

553 To decipher differentially-expressed, coregulatory gene modules within each cluster, we  
554 also projected both datasets using SWNE on a high-dimensional space correlated with non-  
555 negative matrix factorization (NMF) factor embeddings (Wu et al., 2018). In the stage 4 dataset,  
556 our SWNE visualization (Fig. S4) showed a central precursor population that branches into four  
557 differentiation trajectories: ectoderm, ciliary-band, foregut and neural (Fig. S4A, B). At stage 5,  
558 the protonephridia cluster emanated from the central ectodermal cluster while the neural cluster  
559 split into two, giving rise to the neurosecretory cluster (Fig. S6A, B).

560 Based on our SWNE embeddings plot, we deciphered differentially expressed genes for  
561 each cluster. The highest number of differentially expressed genes were found in the neural cell-  
562 cluster in both stages. For example, at stage 4, a glutamate receptor gene *grik4* and a tyrosine-  
563 protein phosphatase non-receptor type 4 gene (*ptn4*) were found to be coregulated together in a  
564 subset of neural cells (Fig. S4B). The gene *ptn4* encodes for a non-receptor tyrosine kinase  
565 (nRTK), and members of this family have been found to be abundantly present in excitatory  
566 synapses in the mammalian brain where they interact directly with glutamate receptors and  
567 phosphorylate tyrosine sites (Mao and Wang, 2016). Hence, cells expressing “factor 3” within  
568 the neural cluster may represent neurons that are excited by glutamate (Fig. S4A). These may  
569 also represent one of the first neuronal sub-types to differentiate during early *C. teleta*  
570 development. At stage 5, some uniquely expressed genes in the neurosecretory cells revealed by  
571 our SWNE analysis include *myom1* (myomodulin neuropeptides 1) and *orckB* (orcokinin  
572 neuropeptides class B) (Fig. S6B). Myomodulin is a bioactive neuropeptide that was found to be  
573 secreted by a cholinergic motor neuron in the mollusk *Aplysia californica* and regulates

574 contraction of the buccal muscles during feeding (Cropper et al., 1987). Putative neurosecretory  
575 cells expressing *myom1* in *C. teleta* were coregulated with other G-protein coupled receptor  
576 messengers such as *plpr1* and *y1760* that provide insight into the *myom1* mediated neuropeptide  
577 signaling pathway (Fig. S6B). An orcokinin-like neuropeptide was previously identified in the *C.*  
578 *teleta* genome (Veenstra, 2011). Orcokinins have been detected in multiple other taxa such as  
579 insects, crustaceans, tardigrades, mollusks and sea-stars. In crustaceans, orcokinin neuropeptides  
580 have been shown to act as neuromodulators in the CNS and regulate peripheral neuromuscular  
581 junctions (Li et al., 2002). Using our unsupervised graph clustering and SWNE analysis, we  
582 show developmental trajectories of multiple cell types simultaneously, which was previously not  
583 possible using other techniques in *C. teleta*.

584

### 585 **Sub-clustering of neural cells reveals neural cell type diversity during neurogenesis**

586 To gain better insight into the different neural cell types present in our stage 5 dataset, we  
587 further subclustered and curated cells from the neural (C3) and neurosecretory clusters (C4)  
588 using Seurat to obtain neural-specific t-SNE and UMAP plots (Fig. 5, Fig. 6, Fig. S7). Some  
589 proliferative cells expressing *Ct-soxB1* and bHLH factors like *Ct-ash1* and *Ct-ngn* were found to  
590 cluster within the C0 and C2 cells, however, their exact identity was not clear (see previous  
591 section) and hence these cells were not included in this analysis. As t-SNE plots do not preserve  
592 global data structure, i.e., only within cluster distances are meaningful and between cluster  
593 similarities are not guaranteed, we also plotted UMAP plots to better project the relationships of  
594 the individual neural subclusters (Fig. 6A, Fig. S7). SWNE analysis was also performed on the  
595 neural sub-cluster dataset to identify co-expressed genes (Fig. S8).

596           Based on our t-SNE plot, we identified four clusters within the combined neural and  
597 neurosecretory group: (a) undifferentiated neural progenitors, (b) intermediate differentiation  
598 bridge, (c) differentiating neurosecretory cells and (d) mature neurons/neurosecretory cells  
599 containing a mixture of neurons with both neurotransmitter and neurohormonal output (Fig. 5A).  
600 The undifferentiated progenitors were identified based in the expression of S-phase markers such  
601 as *cdc6*, *cks1*, *rfa2*, *dpola*, *wee1* and replication licensing factors such *mcm3* and *mcm7* (Fig. 5B,  
602 C) as well as M-phase markers such as *ccnb*, *mpip* and *cdk1*. These cells were also found to  
603 exclusively express *Ct-notch* (Fig. 5B, C). *Ct-notch* is expressed in both surface and subsurface  
604 cells the anterior neuroectoderm at stage 5 (Meyer and Seaver, 2009). We have previously shown  
605 in the *C. teleta* anterior neuroectoderm that surface cells primarily comprise rapidly dividing  
606 neural precursor cells (NPCs) while subsurface cells are largely post-mitotic neural cells (Meyer  
607 and Seaver, 2009; Sur et al., 2017; Sur et al., 2020). Hence this cluster may represent a  
608 combination of rapidly dividing NPCs and a few progenitors with limited proliferative potential.  
609 We named this cluster “NPCs”. Similar to our previous observations using EdU and fluorescent  
610 in-situ hybridization (FISH) (Sur et al., 2020), we observed *Ct-ash1* and *Ct-ngn* expression in  
611 this cluster (Fig. 5B, C, blue arrow). These undifferentiated cells were also found to express *Ct-*  
612 *msi* and *Ct-elav2* albeit at a much lower level (Fig. 5B) indicating that neural progenitors  
613 possibly express *Ct-msi* at lower expression levels.

614           We detected two transitional differentiation states (blue and green populations), one  
615 uniquely expressing pan-neural markers like *Ct-msi* and *Ct-elav2* that we named “differentiation  
616 bridge” and the other uniquely expressing *glutamine synthetase (glna2)*, *androglobin (adgb)*,  
617 *endophilin-1 (shlb1)*, *neuroendocrine convertase (nec2)*, and *synaptotagmin-4 (syt4)* (Fig. 5A,  
618 B). *Glna2* is an enzyme involved in glutamine synthesis in excitatory glutaminergic neurons and

619 has been shown to regulate the secretion of various adenohipophyseal hormones (Hrabovszky  
620 and Liposits, 2008). *Syt4* was found to be expressed in the neuroendocrine center of the  
621 vertebrate hypothalamus regulating oxytocin secretion (Zhang et al., 2011) as well as in the  
622 neuroendocrine center of the *P. dumerlii* head (Kaia Achim, 2017). Based on the expression of  
623 these genes, which are involved in the neuroendocrine pathway, we named this cell cluster  
624 (green population) “neurosecretory”. Both the intermediate differentiation bridge and  
625 differentiating neurosecretory cells (blue and green), expressed *Ct-elav1*, *Ct-neuroD* and *Ct-pou6*  
626 (Fig. 5B, C, Fig. 6A, Fig. S7A). A subset of cells in the “differentiation bridge” also expressed  
627 *Ct-ngn* and *Ct-ash1* indicating a later role in *C. teleta* neurogenesis (Fig. 5B, C).

628         The fourth cell population within the neural cluster expressed mature neuronal markers  
629 such as *synaptotagmin-1* (*Ct-syt1*), *alpha-tubulin*, *Ct-synapsin* as well as neurosecretory markers  
630 such as *Ct-syt4* (Fig. 5B, C). Within the mature neuronal cell type, we detected a variety of  
631 neuronal subtypes: (i) glutaminergic neurons expressing *glutamine synthetase* (*glna2*) and  
632 *vesicular glutamate transporter* (*vgl2b*), (ii) cholinergic neurons expressing *acetylcholinesterase*  
633 (*aces*) and *vesicular acetylcholine transporter* (*vacht*), (iii) GABAergic neurons expressing  
634 *sodium- and chloride-dependent GABA transporter 1* (*sc6a1*), and (iv) neuroendocrine subtypes  
635 expressing *Ct-syt4*, *secretogranin-V* and *prohormone-4* among others (Fig. 5A–C). A subset of  
636 cells in the “mature neuron” cluster expressed these neuroendocrine genes at a much higher level  
637 than observed in the differentiating neurosecretory cells (green population), possibly indicating  
638 that these are mature neuroendocrine cells that clustered with the other mature neuronal subtypes  
639 (Fig. 5B). Overall, our t-SNE and UMAP analyses highlighted different neural cell types that  
640 were previously reported (Meyer and Seaver, 2009; Sur et al., 2017; Sur et al., 2020) as well as

641 previously unknown neuronal subtypes within each cell-cluster that await further  
642 characterization.

643         Next, we applied SWNE analysis to identify coregulated gene modules within each  
644 neural cell type (Fig. S8). We observed different sets of co-expressed genes in the  
645 undifferentiated cluster. One such coregulated subset of genes included *cks1* (cyclin-dependent  
646 kinase regulatory subunit 1), *bafB* (Barrier to autointegration factor B) and *hgv2* nucleosomal  
647 assembly factor. All three genes in this module play important roles in cell-cycle progression  
648 (Furukawa et al., 2003) (Fig. S8A, B). The differentiation transition states were also found to co-  
649 express genes such as *neuroD*, *dpys* and *rdh11* and *talin-1* indicating that cells in this cluster are  
650 already on distinct neural differentiation trajectories. *Talin-1* was expressed in another gene  
651 module present in the differentiating neurosecretory cells along with an EF-hand domain  
652 containing protein and a gene encoding a potassium voltage-gated channel subfamily H8  
653 (*kcnh8*). Among the cells that clustered within the mature neuronal cluster, we detected subsets  
654 of cells expressing genes encoding V-type proton ATPase (*vat1*) as well as peptidergic neuronal  
655 markers such as *myom1* and *orckB* (Fig. S8A, B).

656

### 657 **Computational lineage reconstruction reveals temporal relationships between neural cell** 658 **types**

659         To understand pseudotemporal relationships between the different neural cell types at  
660 stage 5, we used Monocle3.0.2, which orders cells based on similarities of their global  
661 transcriptional profiles. Starting from the neighborhood graph generated in t-SNE or UMAP  
662 space (Fig. 6A), Monocle uses reversed graph embedding to reconstruct single-cell trajectories in  
663 a fully unsupervised manner (Trapnell et al., 2014a; Qiu et al., 2017). Using Monocle, we also

664 identified variable gene sets or modules in different cell states (Fig. S9). While running the  
665 Monocle3 algorithm without any assumptions about the trajectory, we obtained an abstracted  
666 graph that allowed us to derive a single differentiation tree that included all the neural cell types  
667 and linked them to one root, the NPC cluster (Fig. 6B). Along the trajectory, cells were ordered  
668 based on their developmental origin and state of differentiation (Fig. 6A, B). This generated a  
669 pseudotime trajectory with six distinct cell states (Fig. 6C–E). These were defined by the  
670 expression of *Ct-notch* and S-phase markers (*mcm7*, *rfa2*, *dpola*, *cks1*) for the NPC state; *Ct-ngn*  
671 and *wee1* for a progenitor state; *kif1a*, *band7*, *mprg*, *hemicentin-1*, and *Ct-syt4* for an  
672 intermediate neuronal differentiation state; *pal2*, *glna2*, *plp*, and *rdh11* for an intermediate  
673 neurosecretory differentiation state; *Ct-syt1*, *Ct-synapsin*, *synaptobrevin*, *neurensin*,  
674 *neuroendocrine convertase-2 (nec2)* among others in the final state comprising both mature  
675 neuronal and neuroendocrine cell types (Fig. 6E, Fig. S7A–G). Interestingly, the proximity of  
676 these cell types in the UMAP plot (Fig. 6A) indicated that their transcriptomes are closely related  
677 in a continuous fashion.

678 To identify temporal progression of genes that may be involved in neurogenic cell fate  
679 decisions, we mapped some previously characterized genes that significantly varied in their  
680 pseudotemporal expression and looked more closely at their expression dynamics (Fig. 6C). This  
681 analysis showed several discrete shifts in gene expression patterns during *C. teleta* neurogenesis.  
682 For example, S-phase markers (*mcm7*, *rfa2* and *dpola*) and *Ct-notch* were only expressed in  
683 proliferating NPCs and were rapidly downregulated at the onset of differentiation (Fig. 6D, E).  
684 In another subset of NPCs (Fig. 6A–C), genes like *wee1*, *Ct-ngn* and other bHLH transcription  
685 factors such as *Ct-ash1* and *Ct-atonal* were upregulated later in pseudotime than the S-phase  
686 markers and were not downregulated until the latter stages of neural differentiation (Fig. 6D, E;

687 Fig. S9). Expression of *Ct-neuroD* peaked as *Ct-soxB1* and *Ct-ngn* began to become  
688 downregulated (Fig. 6D). Such an observation closely follows patterns obtained using double-  
689 FISH and FISH+EdU experiments reported previously (Sur et al., 2020). Genes involved in  
690 imparting a neurosecretory identity such as *secretogranin-V*, *pal2* and *glutamine synthetase*  
691 (*glna2*) were found in the next step of the cascade of differentiating cells (Fig. 6A–E). These  
692 genes turned on as *Ct-neuroD* expression began to decline (Fig. 6D) but were downregulated  
693 prior to the expression of the next subset of markers such as *Ct-syt1*, *Ct-syt4*, *Ct-synapsin*,  
694 *neurensin*, and *synaptobrevin (snaa)* among others, which initiated their expression and  
695 increased later in pseudotime (Fig. 6E, Fig. S7G). These late-expressing genes like *Ct-syt1*, *Ct-*  
696 *syt4*, *Ct-synapsin* and *snaa* likely modulate neurotransmitter and neurohormonal release in the  
697 presynaptic cleft and hence are expressed in mature neurons. Therefore, our pseudotemporal  
698 analysis revealed the onset of the neurosecretory program prior to the neuronal program. Neural  
699 subtype specific markers such as *acetylcholinesterase (aces)*, *vesicular acetylcholine transporter*  
700 (*vacht*), *glna2* and *sc6a1* were expressed even later in pseudotime and represent different  
701 neuronal subtypes such as cholinergic and GABAergic neurons (Fig. 6E, Fig. S7D).  
702 Interestingly, we also observed expression of *neuroendocrine convertase (nec2)* in this  
703 pseudotemporal cluster indicating some mature neuroendocrine cells as well. Overall our  
704 pseudotemporal analysis elucidated two differentiation trajectories from undifferentiated  
705 progenitors to mature neuronal or neurosecretory cell types and identified both previously-  
706 known and unknown markers for neurogenesis along both trajectories in *C. teleta*.

707

708 **RNA velocity analysis confirms lineage relationships predicted by Monocle3**

709 To independently validate the differentiation trajectories predicted by Monocle3 and to  
710 gain insight into dynamics of stem-cell activation and differentiation, we used velocity (La  
711 Manno et al., 2018), a computational method that tracks recent changes in transcriptional rate of  
712 a gene to predict future mRNA levels of that gene (Fig. 7A, B). These transcriptional rate  
713 changes are estimated for each gene by calculating the ratio of spliced versus unspliced reads in  
714 the sequencing data (Fig. S10A, B; Fig. S11) and extrapolating over all genes across all cells in  
715 the dataset. The timescale of future cell-state prediction is on the scale of a few hours (La Manno  
716 et al., 2018).

717 We estimated RNA velocity for each cell within the combined neural and neurosecretory  
718 group at stage 5 (C3 + C4) to assess the relationship between NPCs, differentiating neurons and  
719 mature neurons. We projected the estimated cell states onto the t-SNE plot, which describes the  
720 path predicted by the RNA velocity algorithm and visualized the results by plotting an arrow for  
721 each cell spanning its actual and predicted future cell state. Hence, cells that are transcriptionally  
722 active have long arrows, whereas cells that are undergoing very low transcriptional turnover have  
723 either short or no arrows. For example, in the mature neuronal cell-cluster we observed little and  
724 uncoordinated RNA velocity indicating that these cells are transcriptionally stable and are  
725 undergoing less changes at the RNA level, reinforcing that these cells represent terminally  
726 differentiated cell types (Fig. 7A, B). Projecting the RNA velocity of individual cells states on a  
727 PCA plot separated each cell cluster and captured the main neural differentiation axis (Fig.  
728 S10C–F). Similarly, within the NPC cluster (purple), a subset of cells exhibited very short  
729 arrows indicating very low RNA metabolism whereas another subset was found to have  
730 relatively longer arrows pointing along the differentiation axis (Fig. 7A, B). Finding differential



731 transcriptional activity in this cluster highlights that this is a heterogenous population, similar to  
732 what we detected using Monocle3 pseudotemporal analysis (Fig. 6E).

733 We observed differences in RNA velocity between the two differentiation trajectories as  
734 well. In the neuronal differentiation trajectory, RNA velocity was higher than that in the  
735 neurosecretory trajectory. However, arrows within both trajectories pointed away from the NPCs  
736 indicating the direction of differentiation. Decreasing RNA velocity towards the far end of the  
737 neurosecretory trajectory led us to speculate that these cells have a stable transcriptome and may  
738 represent terminally differentiated neurosecretory cells. We identified the root of the  
739 differentiation process in the NPC cluster similar to our observations from pseudotime analysis  
740 and trajectory prediction using Monocle3. We also identified two cells that lie close to each other  
741 in t-SNE space and point along the direction of each differentiation trajectory, possibly  
742 representing neural and neurosecretory progenitors, respectively (Fig. 7A, red circle). The paths  
743 predicted by velocityto largely agree with the trajectories predicted by Monocle, which supports  
744 two independent differentiation trajectories for neurons and neurosecretory cells. The continuity  
745 of cells in t-SNE space obtained using our RNA velocity analysis (Fig. 7A, B) coupled with  
746 pseudotime analysis (Fig. 6C–E) and gene expression across cell types (Fig. 5B, C) highlights  
747 the continuous nature of *C. teleta* neurogenesis, making rigid classification of neural cell types  
748 along the differentiation trajectory difficult.

749

## 750 **Discussion**

751 We present here one of the first scRNAseq studies on a spiralian annelid using the 10X  
752 genomics platform. Our experimental design and analysis revealed that 10X genomics may not  
753 be the optimal platform for sequencing dissociated cells from spiralian larvae due to their smaller

754 cell size as compared to most well-studied vertebrate taxa. Due to the automated droplet-  
755 generation and cell-capture procedures as part of the 10X workflow, we suspect that our cells  
756 may not have been captured efficiently and that resulted in low RNA recovery. Therefore, future  
757 scRNAseq approaches in spiralian taxa need to be designed using manual capture of cells more  
758 along the lines of SmartSeq approaches that have the potential to generate high-quality libraries  
759 from low RNA input samples (Satija et al., 2015; Farrell et al., 2018). However, SmartSeq  
760 approaches are less cost-effective than bulk droplet-capture procedures like 10X genomics and  
761 DropSeq (Ziegenhain et al., 2017), making future efforts at optimizing these techniques for  
762 spiralian important.

763         Despite the technical challenges of using 10X genomics with cells of small sizes, our  
764 study allowed us to investigate gene expression, developmental trajectories and identify  
765 molecular domains in larvae at two different stages for the annelid *Capitella teleta*. Using this  
766 approach, we demonstrate that (i) previously characterized marker genes in *C. teleta* can be used  
767 to annotate bioinformatically derived cell-clusters, (ii) Louvain clustering analysis can resolve  
768 the entire *C. teleta* body plan into distinct molecular domains based on differential gene  
769 expression, and (iii) trajectory analysis can track continuous changes in pseudotemporal gene  
770 expression patterns during differentiation of certain cell types. Recent work has only examined  
771 gene expression dynamics in *C. teleta* using WMISH and immunolabeling experiments, and we  
772 view our study as a first step towards understanding annelid and eventually spiralian  
773 development at a systems level. Furthermore, we present the differential gene expression  
774 analyses and cell types in this study as hypotheses that require validation via functional and in  
775 situ expression studies to test the accuracy of the *in-silico* predictions made here.

776

777 **Molecular subdivision of the *C. teleta* larval body**

778           Our data allow comparison of cell types at the single-cell level across the entire animal.  
779 Our unsupervised clustering approaches classified the *C. teleta* larval whole-body into eight  
780 distinct molecular domains – (i) generic precursor cells, (ii) ectodermal precursors, (iii)  
781 myoblasts, (iv) ciliary-bands, (v) gut secretory cells, (vi) neural cells, (vii) neurosecretory cells,  
782 and (viii) protonephridia. By comparing our findings with previous studies, we created an  
783 annotated list of markers for each of the cell clusters that were previously characterized as well  
784 as novel markers as highlighted in the Results section. Our multifaceted analyses revealed the  
785 progressive origin of tissues and how the genes underlying the development of these tissues  
786 change across the two larval stages. The first few discrete clusters to originate soon after  
787 gastrulation included gut, ciliary-band and nervous system. After 24 hours of development, more  
788 discrete clusters were identified including neurosecretory cells and protonephridia. Interestingly,  
789 neurosecretory properties were detected as early as stage 4 (~24 hours post gastrulation), but  
790 these cells clustered together with neurons. Based on previous work, neurons in *C. teleta* are first  
791 detected in the developing brain at stage 4 (Meyer and Seaver, 2009; Meyer et al., 2015; Sur et  
792 al., 2017). The presence of neurosecretory cells together with neurons in our stage 4 t-SNE plot  
793 indicates a considerable neuronal diversity at the initial stages of *C. teleta* development. Such  
794 early appearance of diverse neurons may enable *C. teleta* larvae to respond to environmental  
795 stimuli. Furthermore, from our pseudotemporal analysis on the neural and neurosecretory  
796 subclusters, we inferred progressive changes in gene expression during the progression of NPCs  
797 to neurons. Our data suggest a cascade in which early cell-cycle markers are rapidly  
798 downregulated followed by an upregulation of neural differentiation markers such as *Ct-neuroD*  
799 and subsequently by orthologs of genes involved in neuronal migration and terminal

800 differentiation genes that function in mature neurons. Using a marker-independent approach,  
801 velocity, we also computed RNA velocity within the neural cell clusters and recovered similar  
802 differentiation trajectories and transcriptional dynamics that we deduced using Monocle,  
803 showing the robustness of our approaches.

804

### 805 **Evolutionary comparisons of the *C. teleta* cell types with other annelids**

806 Our *C. teleta* single-cell analysis presented here enables a systematic comparison of cell  
807 types across species. We found that cells at stages 4 and 5 in *C. teleta* expressed many genes  
808 shared with homologs in *P. dumerilii* larvae around a similar developmental stage (Kaia Achim  
809 2017). For example, gut primordial cells of endodermal origin expressing *hnf4a* and *collagen*  
810 *alpha 3*, ciliary-bands expressing *rsph3*, *tekt4a*, *tekt1a*, and *ift80*, and myoblasts expressing  
811 *myosin* were found to be similar to that in *P. dumerilii* (Kaia Achim 2017). We observed  
812 consistent expression of *tektin* homologs in the ciliary band cluster across the two stages in *C.*  
813 *teleta*, and these homologs were previously reported in ciliary bands of *P. dumerilii* and another  
814 annelid *Hydroides elegans* (Arenas-Mena et al., 2007; Kaia Achim, 2017). Recent reports show  
815 the expression of *tektin* homologs in the *P. dumerilii* prototroch, ciliated apical organ, telotroch  
816 and two pairs of paratrochs, and axonemal dyenin homologs in all ciliary structures of the  
817 mollusk *Tritia obsoleta* (Wu et al., 2020b), similar to our findings in *C. teleta*. This suggests that  
818 a role of *tektin* homologs in the ciliary bands of annelid larval trocophores may have been a  
819 conserved feature. A recent report by Wu et al., 2020b uncovered two spiralian-specific genes  
820 expressed in the ciliary bands of most spiralians called *lophotrochin* and *trochin*. These genes  
821 along with the markers identified in our study provide a valuable resource in further  
822 characterization of the origin of ciliary bands within Spiralia.

823           Some of gut cells described here express *Ct-blimp1* and represent endodermal midgut  
824 precursors (Boyle et al., 2014). In both *C. teleta* and *P. dumerilii*, the large, yolky midgut cells  
825 originate from the vegetal macromeres (Ackermann et al., 2005; Meyer et al., 2010). We only  
826 noticed shared expression of *hnf4a* between both annelids but not expression of any of the other  
827 *P.dumerilii* “gut” markers in our dataset (Kaia Achim, 2017). We think it is likely that we may  
828 have size-excluded a majority of large, yolky midgut cells at stages 4 and 5 that were larger than  
829 40 µm in size prior to cell-capture (see Materials and methods). Whether the genetic  
830 developmental program is conserved between the two annelids needs more investigation.

831           Within the neural and neurosecretory cell types, we also identified markers that were  
832 previously detected in the scRNAseq dataset for *P. dumerilii* larvae (Kaia Achim 2017).  
833 Subclustering these cell types allowed us to detect coherent sets of effector genes and  
834 transcription factors expressed at different pseudotimes, representing distinct cellular modules,  
835 e.g. NPCs, intermediate differentiation bridge, differentiating neurosecretory cells, and mature  
836 neurons and neuroendocrine cells. In addition, we also observed considerable differences in gene  
837 expression even within individual neural subgroups highlighting distinct but related cell types.  
838 For example, within the NPC cluster, we observed two different gene modules that were  
839 expressed at different pseudotimes and had differential transcriptional activity, indicating a  
840 heterogenous population of NPCs. From our subclustering analysis of neural cells, we identified  
841 putative *phc2*<sup>+</sup> neurosecretory cells in *C. teleta*, which may be homologous to *phc2*<sup>+</sup>  
842 neurosecretory centers in *P. dumerilii* and other spiralian (Tessmar-Raible et al., 2007; Kaia  
843 Achim, 2017). *Phc2*<sup>+</sup> neuroendocrine centers were also detected apically in the developing larval  
844 brain of *P. dumerilii* are were found to express other vertebrate-type neuropeptides such as the  
845 Vasotocin/neurophysin prohormone (Kaia Achim, 2017). Vasotocin/neurophysin homologs

846 have been found in many spiralian including annelids (Oumi et al., 1994; Tessmar-Raible et al.,  
847 2007), gastropods (van Kesteren et al., 1992), and cephalopods (Takuwa-Kuroda et al., 2003).  
848 However, we could not detect a vasotocin/neurophysin homolog in *C. teleta* from our scRNAseq  
849 analysis although we only detected one or two conopressin/neurophysin-expressing cells at  
850 stages 4 and 5. Therefore, presence of larval neuroendocrine centers regulating  
851 neurohypophyseal hormonal activity seems to be a conserved feature among spiralian that has  
852 been lost in *D. melanogaster* and *C. elegans* (Tessmar-Raible et al. 2007).

853 Altogether, our *C. teleta* scRNAseq study suggest that comparative studies of neural cell  
854 types across animal evolution using high-throughput scRNAseq is a promising direction for evo-  
855 devo research and needs to be expanded to more taxa. As exemplified here, whole-organism  
856 scRNAseq across many taxa can provide comprehensive insights into metazoan cell type  
857 evolution and tissue-specific genome-wide regulatory networks.

858

859

## 860 **Conflict of Interest**

861 The authors declare that the research was conducted in the absence of any commercial or  
862 financial relationships that could be construed as a potential conflict of interest.

863

## 864 **Author Contributions**

865 Conceptualization: A.S., N.P.M.; Methodology: A.S., N.P.M.; Software: A.S.; Formal analysis:  
866 A.S.; Investigation: A.S.; Writing - original draft: A.S., N.P.M.; Writing - review & editing:  
867 A.S., N.P.M.; Supervision: N.P.M; Funding acquisition: A.S., N.P.M.

868

869 **Funding**

870 This work was funded partly by the Sigma Xi Grants-in-Aid-of-Research (GIAR) acquired by  
871 A.S. (Grant #G2018031596148406) and partly supported by funding from Clark University in  
872 the form of Beaver's grants and Faculty Development grants for N.P.M.

873

874 **Acknowledgements**

875 The authors are grateful to the Boston University Single-Cell Sequencing Core for their services  
876 and their excellent support.

877

878

879

880

881

882

883

884

885

886

887

888

889

890

891

892 **References**

- 893 Achim, K., Pettit, J.B., Saraiva, L.R., Gavriouchkina, D., Larsson, T., Arendt, D., et al. (2015).  
894 High-throughput spatial mapping of single-cell RNA-seq data to tissue of origin. *Nat*  
895 *Biotechnol* 33(5), 503-509. doi: 10.1038/nbt.3209.
- 896 Ackermann, C., Dorresteyn, A., and Fischer, A. (2005). Clonal domains in postlarval *Platynereis*  
897 *dumerilii* (Annelida: Polychaeta). *J Morphol* 266(3), 258-280. doi: 10.1002/jmor.10375.
- 898 Arenas-Mena, C., Wong, K.S., and Arandi-Forosani, N. (2007). Ciliary band gene expression  
899 patterns in the embryo and trochophore larva of an indirectly developing polychaete.  
900 *Gene Expr Patterns* 7(5), 544-549. doi: 10.1016/j.modgep.2007.01.007.
- 901 Bauknecht, P., and Jekely, G. (2017). Ancient coexistence of norepinephrine, tyramine, and  
902 octopamine signaling in bilaterians. *BMC Biol* 15(1), 6. doi: 10.1186/s12915-016-0341-7.
- 903 Blake A. J, J.P.G.K.J.E. (2009). *Capitella teleta*, a new sp. designation for the opportunistic and  
904 experimental *Capitella* sp. I.pdf>. *Zoosymposia* 2, 25-53.
- 905 Boyle, M.J., Yamaguchi, E., and Seaver, E.C. (2014). Molecular conservation of metazoan gut  
906 formation: evidence from expression of endomesoderm genes in *Capitella teleta*  
907 (Annelida). *Evodevo* 5, 39. doi: 10.1186/2041-9139-5-39.
- 908 Butler, A., Hoffman, P., Smibert, P., Papalexli, E., and Satija, R. (2018). Integrating single-cell  
909 transcriptomic data across different conditions, technologies, and species. *Nat Biotechnol*  
910 36(5), 411-420. doi: 10.1038/nbt.4096.
- 911 Cao, J., Packer, J.S., Ramani, V., Cusanovich, D.A., Huynh, C., Daza, R., et al. (2017).  
912 Comprehensive single-cell transcriptional profiling of a multicellular organism. *Science*  
913 357(6352), 661-667. doi: 10.1126/science.aam8940.



- 914 Conzelmann, M., Williams, E.A., Tunaru, S., Randel, N., Shahidi, R., Asadulina, A., et al.  
915 (2013). Conserved MIP receptor-ligand pair regulates Platynereis larval settlement. *Proc*  
916 *Natl Acad Sci U S A* 110(20), 8224-8229. doi: 10.1073/pnas.1220285110.
- 917 Crisp, K.M., Grupe, R.E., Lobsang, T.T., and Yang, X. (2010). Biogenic amines modulate pulse  
918 rate in the dorsal blood vessel of *Lumbriculus variegatus*. *Comp Biochem Physiol C*  
919 *Toxicol Pharmacol* 151(4), 467-472. doi: 10.1016/j.cbpc.2010.02.003.
- 920 Cropper, E.C., Tenenbaum, R., Kolks, M.A., Kupfermann, I., and Weiss, K.R. (1987).  
921 Myomodulin: a bioactive neuropeptide present in an identified cholinergic buccal motor  
922 neuron of *Aplysia*. *Proc Natl Acad Sci U S A* 84(15), 5483-5486. doi:  
923 10.1073/pnas.84.15.5483.
- 924 Elphick, M.R., Mirabeau, O., and Larhammar, D. (2018). Correction: Evolution of neuropeptide  
925 signalling systems (doi:10.1242/jeb.151092). *J Exp Biol* 221(Pt 19). doi:  
926 10.1242/jeb.193342.
- 927 Farrell, J.A., Wang, Y., Riesenfeld, S.J., Shekhar, K., Regev, A., and Schier, A.F. (2018). Single-  
928 cell reconstruction of developmental trajectories during zebrafish embryogenesis. *Science*  
929 360(6392). doi: 10.1126/science.aar3131.
- 930 Finn, R.D., Coghill, P., Eberhardt, R.Y., Eddy, S.R., Mistry, J., Mitchell, A.L., et al. (2016). The  
931 Pfam protein families database: towards a more sustainable future. *Nucleic Acids Res*  
932 44(D1), D279-285. doi: 10.1093/nar/gkv1344.
- 933 Florey, E., and Rathmayer, M. (1978). The effects of octopamine and other amines on the heart  
934 and on neuromuscular transmission in decapod crustaceans: further evidence for a role as  
935 neurohormone. *Comp Biochem Physiol C* 61C(1), 229-237. doi: 10.1016/0306-  
936 4492(78)90136-3.

- 937 Foster, S., Oulhen, N., and Wessel, G. (2020). A single cell RNA sequencing resource for early  
938 sea urchin development. *Development* 147(17). doi: 10.1242/dev.191528.
- 939 Furukawa, K., Sugiyama, S., Osouda, S., Goto, H., Inagaki, M., Horigome, T., et al. (2003).  
940 Barrier-to-autointegration factor plays crucial roles in cell cycle progression and nuclear  
941 organization in *Drosophila*. *J Cell Sci* 116(Pt 18), 3811-3823. doi: 10.1242/jcs.00682.
- 942 Giani, V.C., Jr., Yamaguchi, E., Boyle, M.J., and Seaver, E.C. (2011). Somatic and germline  
943 expression of piwi during development and regeneration in the marine polychaete annelid  
944 *Capitella teleta*. *Evodevo* 2, 10. doi: 10.1186/2041-9139-2-10.
- 945 Hashimshony, T., Wagner, F., Sher, N., and Yanai, I. (2012). CEL-Seq: single-cell RNA-Seq by  
946 multiplexed linear amplification. *Cell Rep* 2(3), 666-673. doi:  
947 10.1016/j.celrep.2012.08.003.
- 948 Hrabovszky, E., and Liposits, Z. (2008). Novel aspects of glutamatergic signalling in the  
949 neuroendocrine system. *J Neuroendocrinol* 20(6), 743-751. doi: 10.1111/j.1365-  
950 2826.2008.01719.x.
- 951 Hung, R.J., Hu, Y., Kirchner, R., Liu, Y., Xu, C., Comjean, A., et al. (2020). A cell atlas of the  
952 adult *Drosophila* midgut. *Proc Natl Acad Sci U S A* 117(3), 1514-1523. doi:  
953 10.1073/pnas.1916820117.
- 954 Kaia Achim, N.E., Hernando Martinez Vergara, Paola Yanina Bertucci, Thibaut Brunet, Paul  
955 Collier, Vladimir Benes, John C Marioni and Detlev Arendt (2017). Whole-body single-  
956 cell sequencing of the *Platynereis* larva reveals a  
957 subdivision into apical versus non-apical tissues. *bioRxiv*. doi: <https://doi.org/10.1101/167742>.
- 958 Kerner, P., Zelada Gonzalez, F., Le Gouar, M., Ledent, V., Arendt, D., and Vervoort, M. (2006).  
959 The expression of a hunchback ortholog in the polychaete annelid *Platynereis dumerilii*

960 suggests an ancestral role in mesoderm development and neurogenesis. *Dev Genes Evol*  
961 216(12), 821-828. doi: 10.1007/s00427-006-0100-9.

962 Kim, Y., McDole, K., and Zheng, Y. (2012). The function of lamins in the context of tissue  
963 building and maintenance. *Nucleus* 3(3), 256-262. doi: 10.4161/nucl.20392.

964 Krause, G., Winkler, L., Mueller, S.L., Haseloff, R.F., Piontek, J., and Blasig, I.E. (2008).  
965 Structure and function of claudins. *Biochim Biophys Acta* 1778(3), 631-645. doi:  
966 10.1016/j.bbamem.2007.10.018.

967 La Manno, G., Soldatov, R., Zeisel, A., Braun, E., Hochgerner, H., Petukhov, V., et al. (2018).  
968 RNA velocity of single cells. *Nature* 560(7719), 494-498. doi: 10.1038/s41586-018-  
969 0414-6.

970 Li, L., Pulver, S.R., Kelley, W.P., Thirumalai, V., Sweedler, J.V., and Marder, E. (2002).  
971 Orcokinin peptides in developing and adult crustacean stomatogastric nervous systems  
972 and pericardial organs. *J Comp Neurol* 444(3), 227-244. doi: 10.1002/cne.10139.

973 Mao, L.M., and Wang, J.Q. (2016). Tyrosine phosphorylation of glutamate receptors by non-  
974 receptor tyrosine kinases: roles in depression-like behavior. *Neurotransmitter (Houst)* 3.

975 Marletaz, F., Peijnenburg, K., Goto, T., Satoh, N., and Rokhsar, D.S. (2019). A New Spiralian  
976 Phylogeny Places the Enigmatic Arrow Worms among Gnathiferans. *Curr Biol* 29(2),  
977 312-318 e313. doi: 10.1016/j.cub.2018.11.042.

978 Meyer, N.P., Boyle, M.J., Martindale, M.Q., and Seaver, E.C. (2010). A comprehensive fate map  
979 by intracellular injection of identified blastomeres in the marine polychaete *Capitella*  
980 *teleta*. *Evodevo* 1(1), 8. doi: 10.1186/2041-9139-1-8.

- 981 Meyer, N.P., Carrillo-Baltodano, A., Moore, R.E., and Seaver, E.C. (2015). Nervous system  
982 development in lecithotrophic larval and juvenile stages of the annelid *Capitella teleta*.  
983 *Front Zool* 12, 15. doi: 10.1186/s12983-015-0108-y.
- 984 Meyer, N.P., and Seaver, E.C. (2009). Neurogenesis in an annelid: characterization of brain  
985 neural precursors in the polychaete *Capitella* sp. I. *Dev Biol* 335(1), 237-252. doi:  
986 10.1016/j.ydbio.2009.06.017.
- 987 Mirabeau, O., and Joly, J.S. (2013). Molecular evolution of peptidergic signaling systems in  
988 bilaterians. *Proc Natl Acad Sci U S A* 110(22), E2028-2037. doi:  
989 10.1073/pnas.1219956110.
- 990 Moghadam, P.K., and Jackson, M.B. (2013). The functional significance of synaptotagmin  
991 diversity in neuroendocrine secretion. *Front Endocrinol (Lausanne)* 4, 124. doi:  
992 10.3389/fendo.2013.00124.
- 993 Oumi, T., Ukena, K., Matsushima, O., Ikeda, T., Fujita, T., Minakata, H., et al. (1994).  
994 Annetocin: an oxytocin-related peptide isolated from the earthworm, *Eisenia foetida*.  
995 *Biochem Biophys Res Commun* 198(1), 393-399. doi: 10.1006/bbrc.1994.1055.
- 996 Park, D., Li, P., Dani, A., and Taghert, P.H. (2014). Peptidergic cell-specific synaptotagmins in  
997 *Drosophila*: localization to dense-core granules and regulation by the bHLH protein  
998 DIMMED. *J Neurosci* 34(39), 13195-13207. doi: 10.1523/JNEUROSCI.2075-14.2014.
- 999 Piontek, J., Winkler, L., Wolburg, H., Muller, S.L., Zuleger, N., Piehl, C., et al. (2008).  
1000 Formation of tight junction: determinants of homophilic interaction between classic  
1001 claudins. *FASEB J* 22(1), 146-158. doi: 10.1096/fj.07-8319com.

- 1002 Plass, M., Solana, J., Wolf, F.A., Ayoub, S., Misios, A., Glazar, P., et al. (2018). Cell type atlas  
1003 and lineage tree of a whole complex animal by single-cell transcriptomics. *Science*  
1004 360(6391). doi: 10.1126/science.aag1723.
- 1005 Qiu, X., Mao, Q., Tang, Y., Wang, L., Chawla, R., Pliner, H.A., et al. (2017). Reversed graph  
1006 embedding resolves complex single-cell trajectories. *Nat Methods* 14(10), 979-982. doi:  
1007 10.1038/nmeth.4402.
- 1008 Saliba, A.E., Westermann, A.J., Gorski, S.A., and Vogel, J. (2014). Single-cell RNA-seq:  
1009 advances and future challenges. *Nucleic Acids Res* 42(14), 8845-8860. doi:  
1010 10.1093/nar/gku555.
- 1011 Satija, R., Farrell, J.A., Gennert, D., Schier, A.F., and Regev, A. (2015). Spatial reconstruction of  
1012 single-cell gene expression data. *Nat Biotechnol* 33(5), 495-502. doi: 10.1038/nbt.3192.
- 1013 Seaver, E.C., Thamm, K., and Hill, S.D. (2005). Growth patterns during segmentation in the two  
1014 polychaete annelids, *Capitella* sp. I and *Hydroides elegans*: comparisons at distinct life  
1015 history stages. *Evol Dev* 7(4), 312-326. doi: 10.1111/j.1525-142X.2005.05037.x.
- 1016 Sebe-Pedros, A., Chomsky, E., Pang, K., Lara-Astiaso, D., Gaiti, F., Mukamel, Z., et al. (2018a).  
1017 Early metazoan cell type diversity and the evolution of multicellular gene regulation. *Nat*  
1018 *Ecol Evol* 2(7), 1176-1188. doi: 10.1038/s41559-018-0575-6.
- 1019 Sebe-Pedros, A., Saudemont, B., Chomsky, E., Plessier, F., Mailhe, M.P., Renno, J., et al.  
1020 (2018b). Cnidarian Cell Type Diversity and Regulation Revealed by Whole-Organism  
1021 Single-Cell RNA-Seq. *Cell* 173(6), 1520-1534 e1520. doi: 10.1016/j.cell.2018.05.019.
- 1022 Shen, Z., and Jacobs-Lorena, M. (1999). Evolution of chitin-binding proteins in invertebrates. *J*  
1023 *Mol Evol* 48(3), 341-347. doi: 10.1007/pl00006478.

- 1024 Simakov, O., Marletaz, F., Cho, S.J., Edsinger-Gonzales, E., Havlak, P., Hellsten, U., et al.  
1025 (2013). Insights into bilaterian evolution from three spiralian genomes. *Nature*  
1026 493(7433), 526-531. doi: 10.1038/nature11696.
- 1027 Sur, A., Magie, C.R., Seaver, E.C., and Meyer, N.P. (2017). Spatiotemporal regulation of  
1028 nervous system development in the annelid *Capitella teleta*. *Evodevo* 8, 13. doi:  
1029 10.1186/s13227-017-0076-8.
- 1030 Sur, A., Renfro, A., Bergmann, P.J., and Meyer, N.P. (2020). Investigating cellular and  
1031 molecular mechanisms of neurogenesis in *Capitella teleta* sheds light on the ancestor of  
1032 Annelida. *BMC Evol Biol* 20(1), 84. doi: 10.1186/s12862-020-01636-1.
- 1033 Svensson, V., Vento-Tormo, R., and Teichmann, S.A. (2018). Exponential scaling of single-cell  
1034 RNA-seq in the past decade. *Nat Protoc* 13(4), 599-604. doi: 10.1038/nprot.2017.149.
- 1035 Takuwa-Kuroda, K., Iwakoshi-Ukena, E., Kanda, A., and Minakata, H. (2003). Octopus, which  
1036 owns the most advanced brain in invertebrates, has two members of vasopressin/oxytocin  
1037 superfamily as in vertebrates. *Regul Pept* 115(2), 139-149. doi: 10.1016/s0167-  
1038 0115(03)00151-4.
- 1039 Tanay, A., and Regev, A. (2017). Scaling single-cell genomics from phenomenology to  
1040 mechanism. *Nature* 541(7637), 331-338. doi: 10.1038/nature21350.
- 1041 Tang, F., Barbacioru, C., Bao, S., Lee, C., Nordman, E., Wang, X., et al. (2010). Tracing the  
1042 derivation of embryonic stem cells from the inner cell mass by single-cell RNA-Seq  
1043 analysis. *Cell Stem Cell* 6(5), 468-478. doi: 10.1016/j.stem.2010.03.015.
- 1044 Terra, W.R., Costa, R.H., and Ferreira, C. (2006). Plasma membranes from insect midgut cells.  
1045 *An Acad Bras Cienc* 78(2), 255-269. doi: 10.1590/s0001-37652006000200007.

- 1046 Tessmar-Raible, K., Raible, F., Christodoulou, F., Guy, K., Rembold, M., Hausen, H., et al.  
1047 (2007). Conserved sensory-neurosecretory cell types in annelid and fish forebrain:  
1048 insights into hypothalamus evolution. *Cell* 129(7), 1389-1400. doi:  
1049 10.1016/j.cell.2007.04.041.
- 1050 Thamm, K., and Seaver, E.C. (2008). Notch signaling during larval and juvenile development in  
1051 the polychaete annelid *Capitella* sp. I. *Dev Biol* 320(1), 304-318. doi:  
1052 10.1016/j.ydbio.2008.04.015.
- 1053 Trapnell, C. (2015). Defining cell types and states with single-cell genomics. *Genome Res*  
1054 25(10), 1491-1498. doi: 10.1101/gr.190595.115.
- 1055 Trapnell, C., Cacchiarelli, D., Grimsby, J., Pokharel, P., Li, S., Morse, M., et al. (2014a). The  
1056 dynamics and regulators of cell fate decisions are revealed by pseudotemporal ordering of  
1057 single cells. *Nat Biotechnol* 32(4), 381-386. doi: 10.1038/nbt.2859.
- 1058 Trapnell, C., Cacchiarelli, D., Grimsby, J., Pokharel, P., Li, S., Morse, M., et al. (2014b). The  
1059 dynamics and regulators of cell fate decisions are revealed by pseudotemporal ordering of  
1060 single cells. *Nat Biotechnol* 32(4), 381-386. doi: 10.1038/nbt.2859.
- 1061 van Kesteren, R.E., Smit, A.B., Dirks, R.W., de With, N.D., Geraerts, W.P., and Joosse, J.  
1062 (1992). Evolution of the vasopressin/oxytocin superfamily: characterization of a cDNA  
1063 encoding a vasopressin-related precursor, preproconopressin, from the mollusc *Lymnaea*  
1064 *stagnalis*. *Proc Natl Acad Sci U S A* 89(10), 4593-4597. doi: 10.1073/pnas.89.10.4593.
- 1065 Veenstra, J.A. (2011). Neuropeptide evolution: neurohormones and neuropeptides predicted  
1066 from the genomes of *Capitella teleta* and *Helobdella robusta*. *Gen Comp Endocrinol*  
1067 171(2), 160-175. doi: 10.1016/j.ygcen.2011.01.005.

- 1068 Vergara, H.M., Bertucci, P.Y., Hantz, P., Tosches, M.A., Achim, K., Vopalensky, P., et al.  
1069 (2017). Whole-organism cellular gene-expression atlas reveals conserved cell types in the  
1070 ventral nerve cord of *Platynereis dumerilii*. *Proc Natl Acad Sci U S A* 114(23), 5878-  
1071 5885. doi: 10.1073/pnas.1610602114.
- 1072 Walker, R.J., Holden-Dye, L., and Franks, C.J. (1993). Physiological and pharmacological  
1073 studies on annelid and nematode body wall muscle. *Comp Biochem Physiol C* 106(1), 49-  
1074 58. doi: 10.1016/0742-8413(93)90253-h.
- 1075 Werbrock, A.H., Meiklejohn, D.A., Sainz, A., Iwasa, J.H., and Savage, R.M. (2001). A  
1076 polychaete hunchback ortholog. *Dev Biol* 235(2), 476-488. doi: 10.1006/dbio.2001.0272.
- 1077 Williams, E.A., Veraszto, C., Jasek, S., Conzelmann, M., Shahidi, R., Bauknecht, P., et al.  
1078 (2017). Synaptic and peptidergic connectome of a neurosecretory center in the annelid  
1079 brain. *Elife* 6. doi: 10.7554/eLife.26349.
- 1080 Wu, K., Li, S., Wang, J., Ni, Y., Huang, W., Liu, Q., et al. (2020a). Peptide Hormones in the  
1081 Insect Midgut. *Front Physiol* 11, 191. doi: 10.3389/fphys.2020.00191.
- 1082 Wu, L., Hiebert, L.S., Klann, M., Passamaneck, Y., Bastin, B.R., Schneider, S.Q., et al. (2020b).  
1083 Genes with spiralian-specific protein motifs are expressed in spiralian ciliary bands. *Nat*  
1084 *Commun* 11(1), 4171. doi: 10.1038/s41467-020-17780-7.
- 1085 Wu, Y., Tamayo, P., and Zhang, K. (2018). Visualizing and Interpreting Single-Cell Gene  
1086 Expression Datasets with Similarity Weighted Nonnegative Embedding. *Cell Syst* 7(6),  
1087 656-666 e654. doi: 10.1016/j.cels.2018.10.015.
- 1088 Zhang, G., Bai, H., Zhang, H., Dean, C., Wu, Q., Li, J., et al. (2011). Neuropeptide exocytosis  
1089 involving synaptotagmin-4 and oxytocin in hypothalamic programming of body weight  
1090 and energy balance. *Neuron* 69(3), 523-535. doi: 10.1016/j.neuron.2010.12.036.



1091 Zhong, S., Zhang, S., Fan, X., Wu, Q., Yan, L., Dong, J., et al. (2018). A single-cell RNA-seq  
1092 survey of the developmental landscape of the human prefrontal cortex. *Nature* 555(7697),  
1093 524-528. doi: 10.1038/nature25980.

1094 Ziegenhain, C., Vieth, B., Parekh, S., Reinius, B., Guillaumet-Adkins, A., Smets, M., et al.  
1095 (2017). Comparative Analysis of Single-Cell RNA Sequencing Methods. *Mol Cell* 65(4),  
1096 631-643 e634. doi: 10.1016/j.molcel.2017.01.023.

1097

1098

1099

1100

1101

1102

1103

1104

1105

1106

1107

1108

1109

1110

1111

1112

1113

1114 **Figure legends**

1115 **Figure 1: Single-cell transcriptomics of stage 4 and 5 *C. teleta* larvae.** Whole-body stage 4  
1116 and 5 (1) larvae were dissociated into single cells using a combination of mechanical and  
1117 enzymatic dissociation (2). Individual cells were randomly selected for droplet generation using  
1118 the 10X Genomics Chromium Platform (3). Single-cell transcriptomes were pooled and  
1119 sequenced using NextSeq500 High-output method (4) generating 573 million reads across the  
1120 two samples. Sequences obtained were curated and aligned to the *C. teleta* genome v1.0  
1121 followed by application of downstream computational pipelines for clustering, trajectory  
1122 analysis, pseudotime analysis and estimating RNA dynamics (5). Scale bar – 10  $\mu$ m.

1123

1124 **Figure 2: Mapping of *C. teleta* larval tissues from aggregated stage 4 and 5 datasets.** (A)  
1125 UMAP representation of the aggregated data (stages 4 and 5), where the clustering of cells  
1126 depicts their transcriptional similarity. (B) Heatmap of the top 10 genes significantly enriched in  
1127 each cluster. Representative gene names obtained from closest reciprocal BLAST hits are shown  
1128 close to each row. The full gene-list is in Tables S2. (C) UMAP plots showing log-normalized  
1129 counts of select representative genes from each cluster. Color intensity is proportional to the  
1130 expression level (purple: high; grey: low). (D) Dotplot of representative genes involved in *C.*  
1131 *teleta* neurogenesis. (E) Dotplot showing novel markers implicated in *C. teleta* myogenesis. (F)  
1132 Dotplot showing orthologs of neurotransmitter and neuropeptide/neurohormone receptors across  
1133 clusters.

1134

1135 **Figure 3: Single-cell molecular landscape of stage 4 *C. teleta* larvae.** (A) t-SNE representation  
1136 of stage 4 larval single cells with clusters labeled by molecular identities. (B) Cell type specific

1137 marker genes reflect cellular identities and functions. Heatmap showing log-normalized  
1138 differentially expressed genes per molecular domain identified. Each row represents a single  
1139 gene whereas each column represents a cell. (C) Analysis with PlotClusterTree in Seurat to  
1140 reveal transcriptomic similarities between clusters. (D) t-SNE plots of cells colored by  
1141 expression of selected marker genes that were used for identifying each molecular domain. The  
1142 color key indicates expression levels (purple: high; grey: low). (E) Violin plots summarizing the  
1143 expression levels of select representative genes per cluster. Data points depicted in each cluster  
1144 represent single cells expressing each gene shown. (F) Dotplot of representative genes involved  
1145 in *C. teleta* neurogenesis at stage 4. (G) Dotplot showing cell proliferation (S-phase and G2/M-  
1146 phase) markers in the stage 4 clusters. cb: ciliary-band.

1147

1148 **Figure 4: Single-cell molecular landscape of stage 5 *C. teleta* larvae.** (A) t-SNE representation  
1149 of stage 5 larval single cells with clusters labeled by transcriptional identities. (B) Cell type  
1150 specific marker genes reflect cellular identities and functions. Heatmap showing log normalized  
1151 differentially expressed genes per molecular domain identified. Each row represents a single  
1152 gene whereas each column represents a cell. (C) t-SNE plots of cells colored by expression of  
1153 selected marker genes that were used for identifying each cluster. The color key indicates  
1154 expression levels (purple: high; grey: low). ns, neurosecretory; pn, protonephridia.

1155

1156 **Figure 5: Neural cell type diversity in stage 5 larvae.** (A) t-SNE representation of single cells  
1157 obtained from the neural + neurosecretory cell clusters generated from unsupervised clustering of  
1158 the stage 5 dataset, labeled and colored based on cluster identity (B) Dotplot showing  
1159 differentially expressed genes per neural cell type identified. Each row represents a single gene

1160 regulating individual aspects of neurogenesis whereas each column represents one of the four  
1161 neural cell types. The expression is log normalized per gene. (C) t-SNE plots colored by  
1162 expression of selected marker genes that were used for identifying each cell type. The color key  
1163 indicates expression levels (purple: high; grey: low). Blue arrow highlights expression of *Ct-*  
1164 *ash1* in the NPC cluster. db, differentiation bridge; ns, neurosecretory.

1165

1166 **Figure 6: Lineage relationships between neural cell types and pseudotime analysis.** (A)

1167 UMAP representation of single-cells from the neural + neurosecretory cell-cluster generated in  
1168 the stage 5 unsupervised clustering. (B) Trajectory analysis using Monocle3 predicts a neural  
1169 differentiation trajectory that begins with NPCs and ends with the mature neuronal and  
1170 neuroendocrine cell cluster. The root of the trajectory lies within the NPC cell-cluster. (C)  
1171 Monocle3 pseudo-temporal ordering of neural cells superimposed on the Seurat UMAP plot.  
1172 Cells are colored based on their progression along pseudo-temporal space from pseudotime 0 in  
1173 violet to the end of differentiation in yellow. (D) Monocle analysis predicts progressive  
1174 expression dynamics of *mcm7* homolog, *Ct-ngn*, *Ct-soxB1*, *Ct-neuroD*, *secretogranin-V*, and *Ct-*  
1175 *syt1*. (E) Heatmaps showing most significant TFs and effector genes clustered by  
1176 pseudotemporal expression pattern (q values < 0.01). Pseudo-temporal ordering is from left  
1177 (NPCs) to right (differentiated neurons). Selected transcription factors are shown for each  
1178 cellular state along the differentiation trajectory.

1179

1180 **Figure 7: RNA velocity plotted in t-SNE space for neural cell types.** (A) Velocity force field

1181 showing the average differentiation trajectories (velocity) for cells located in different parts of  
1182 the tSNE plot. For each cell, arrows indicate the location of the future cell state. RNA dynamics

1183 vary between NPCs, the two differentiation trajectories and mature neurons and also within each  
1184 cell type. Velocity estimates based on nearest cell pooling ( $k=5$ ) were used. Red circle shows  
1185 two cells with velocity fields pointing along the two differentiation trajectories possibly  
1186 representing a progenitor population for neural and neurosecretory cells respectively. (B) Same  
1187 velocity field as A, visualized using Gaussian smoothing on a regular grid.

1188

1189

1190

1191

1192

1193

1194

1195

1196

1197

1198

1199

1200

1. Collecting stages

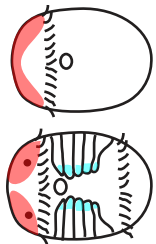

2. Dissociation to single-cells and debris removal

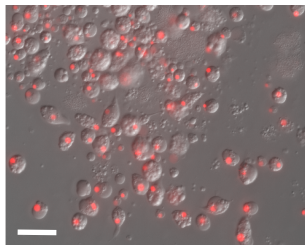

3. 10X genomics (droplet generation and library preparation)

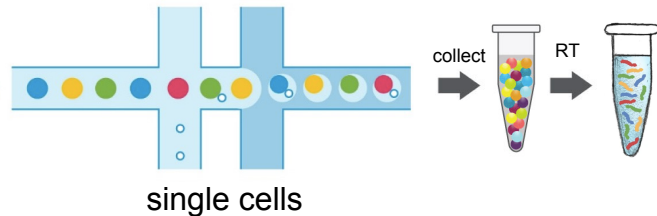

5. Computational analysis

4. Next Seq500 Sequencing

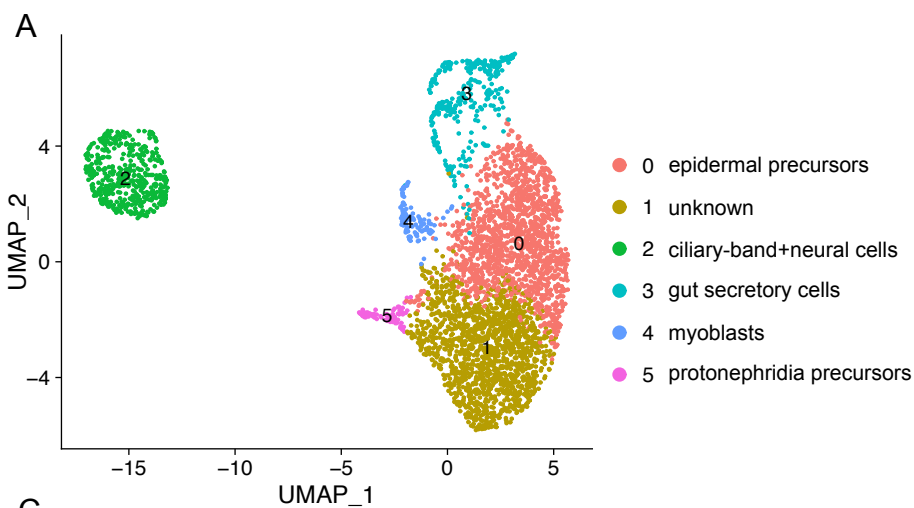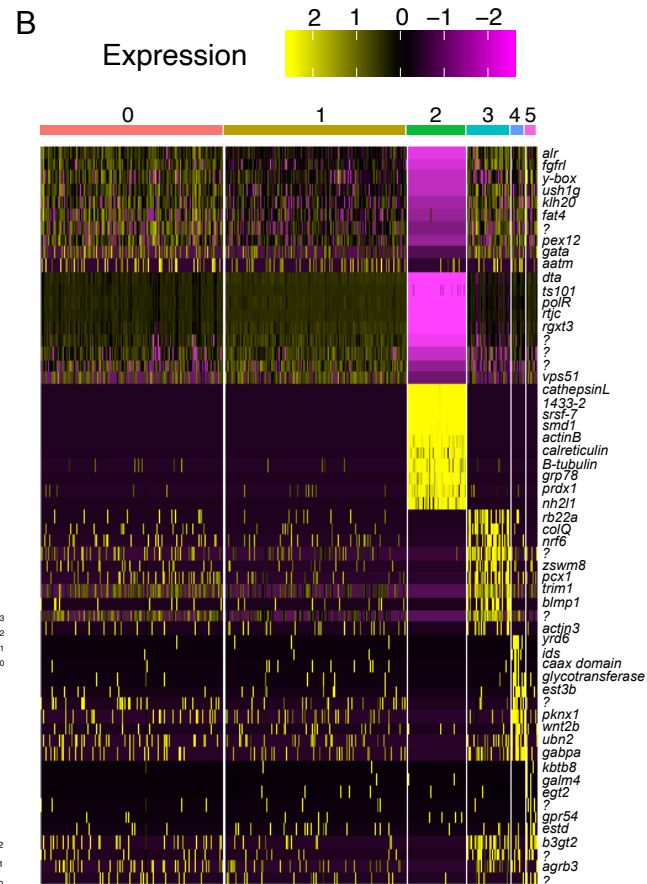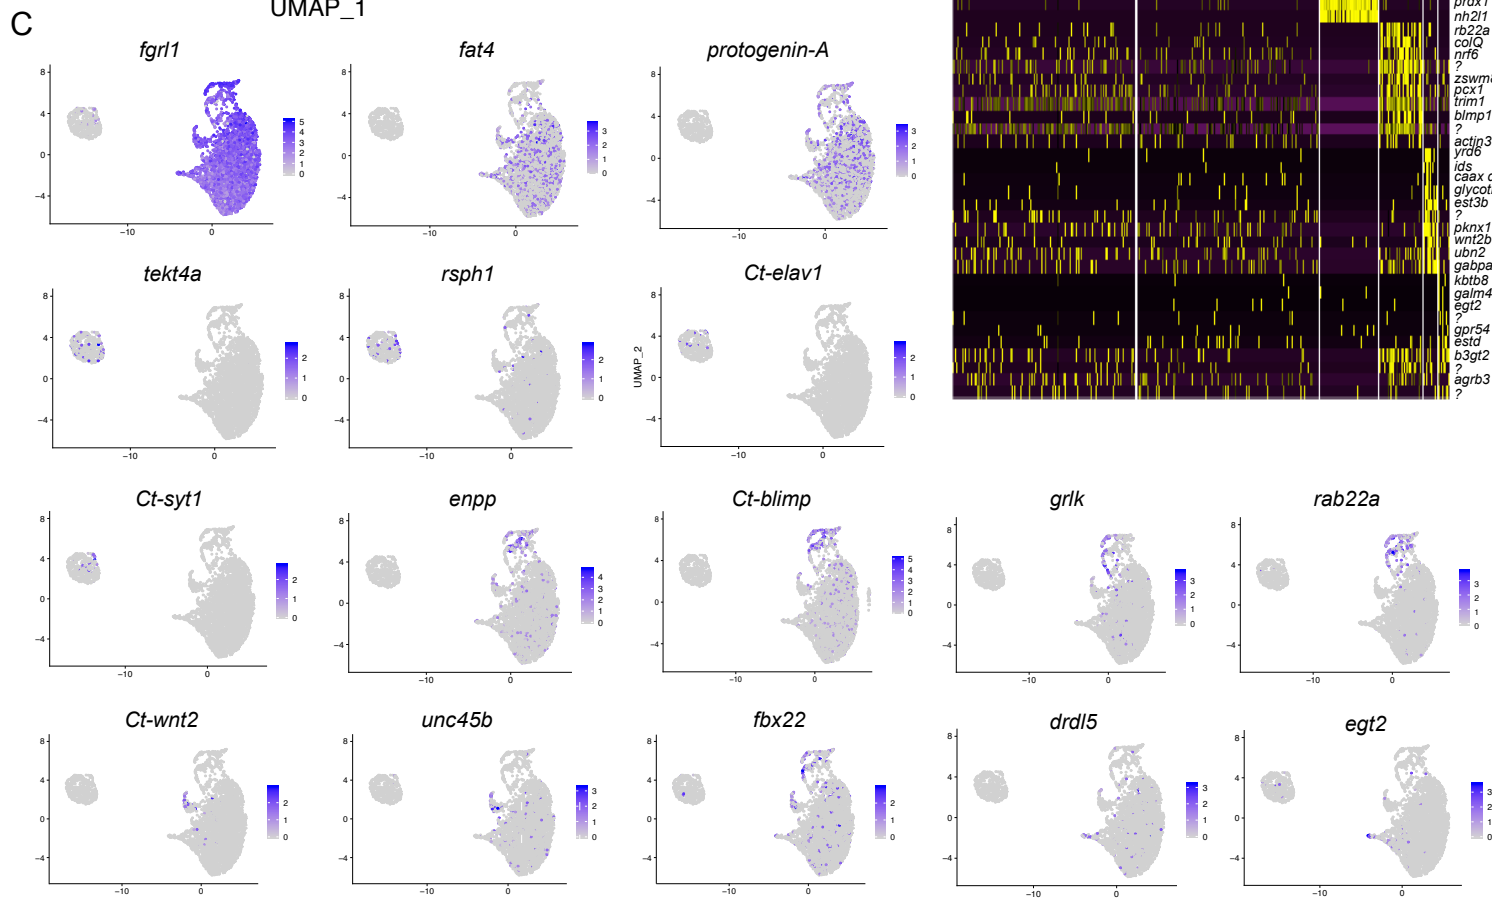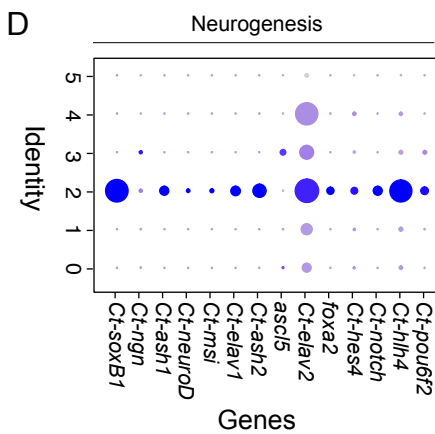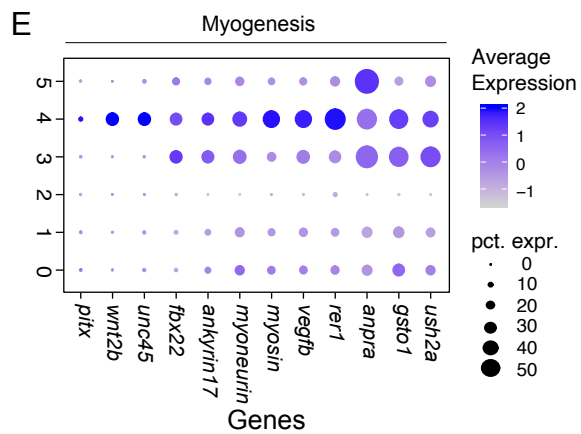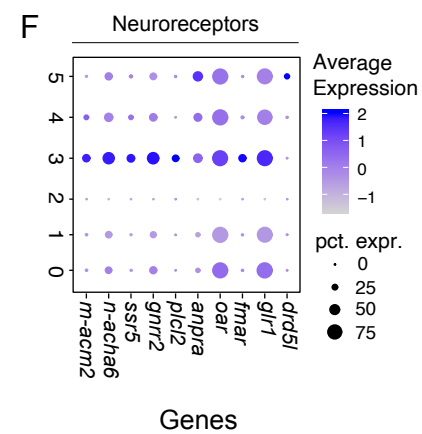

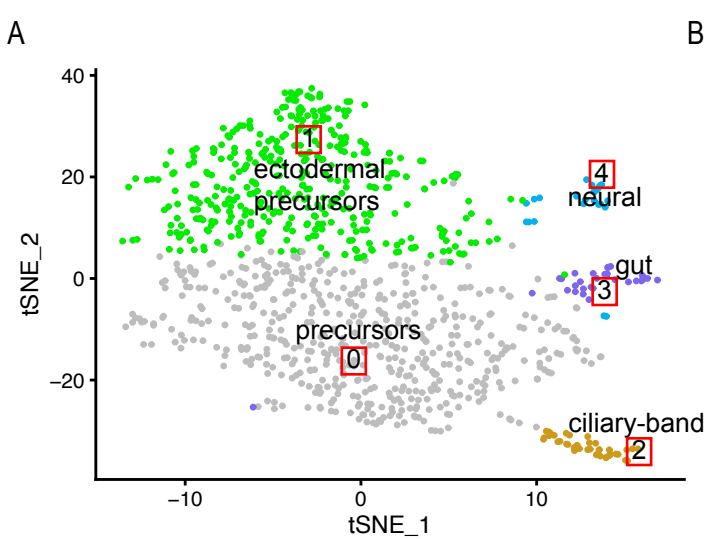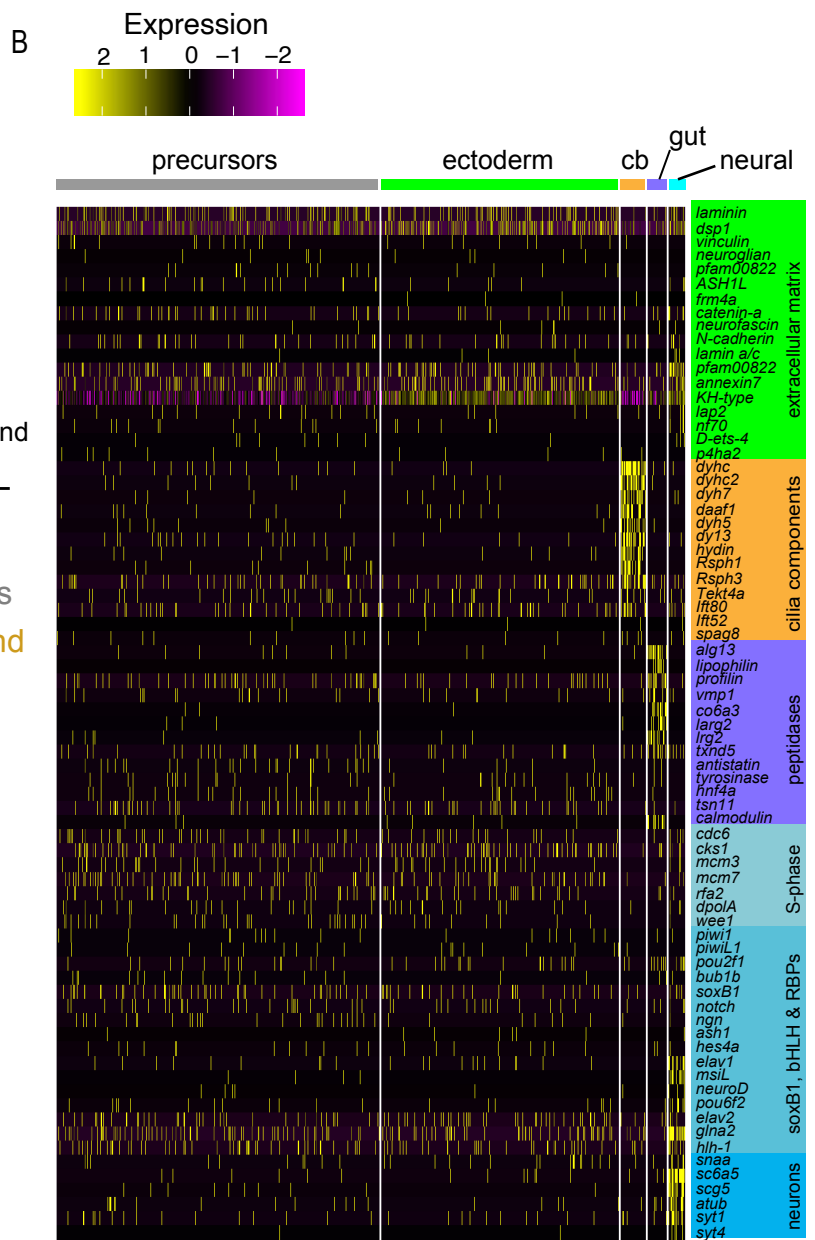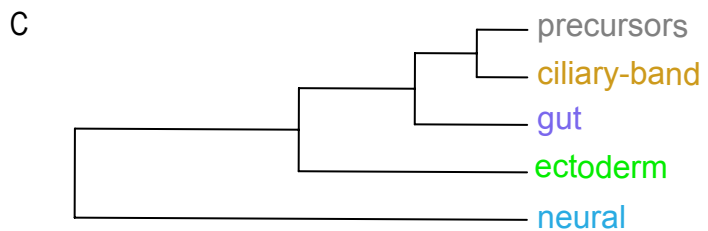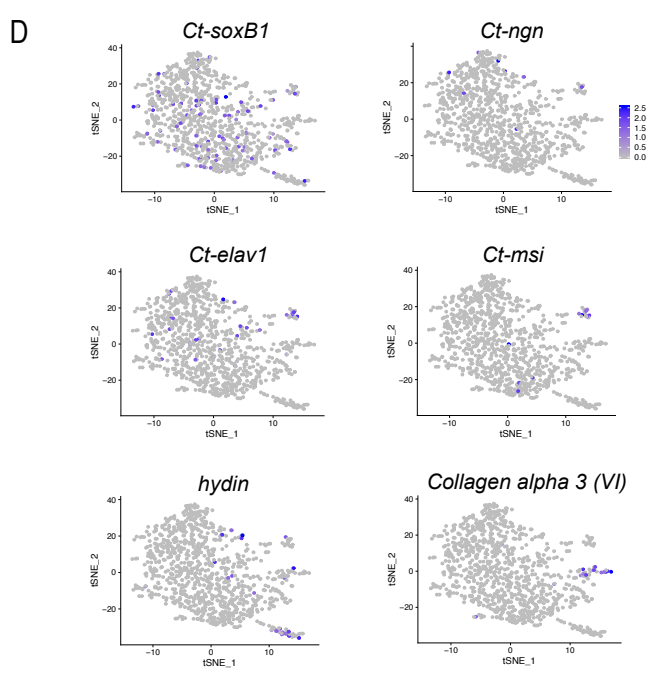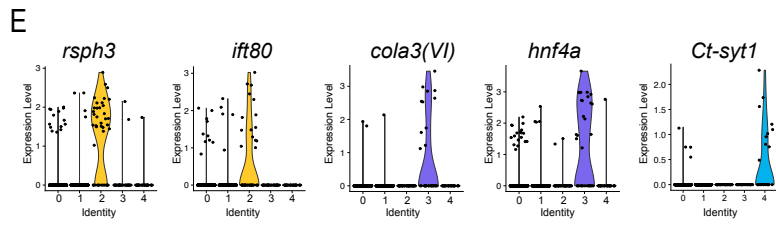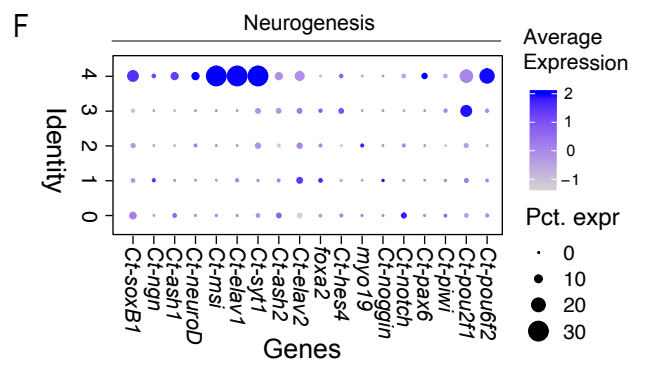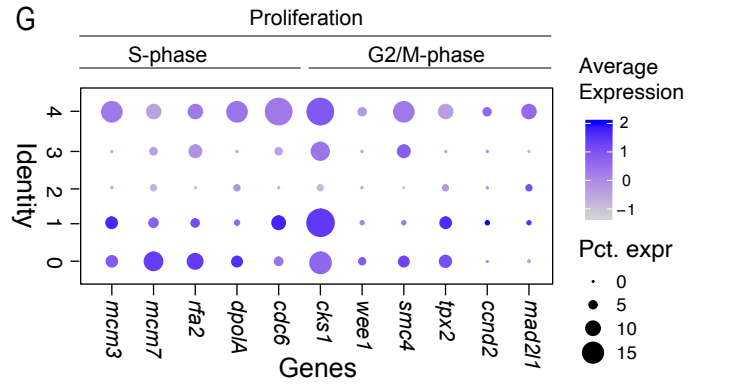



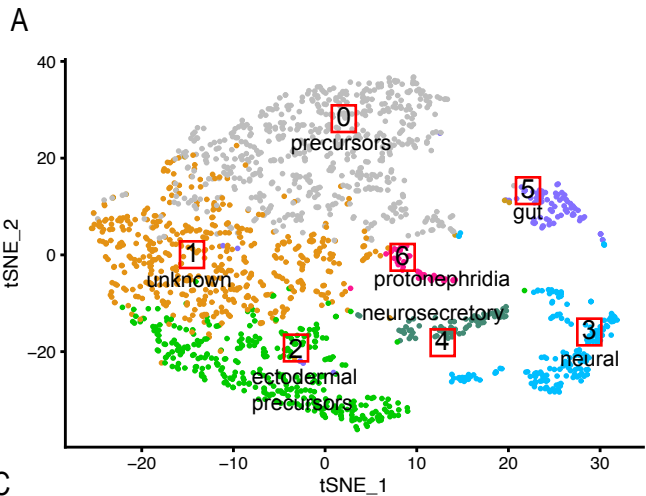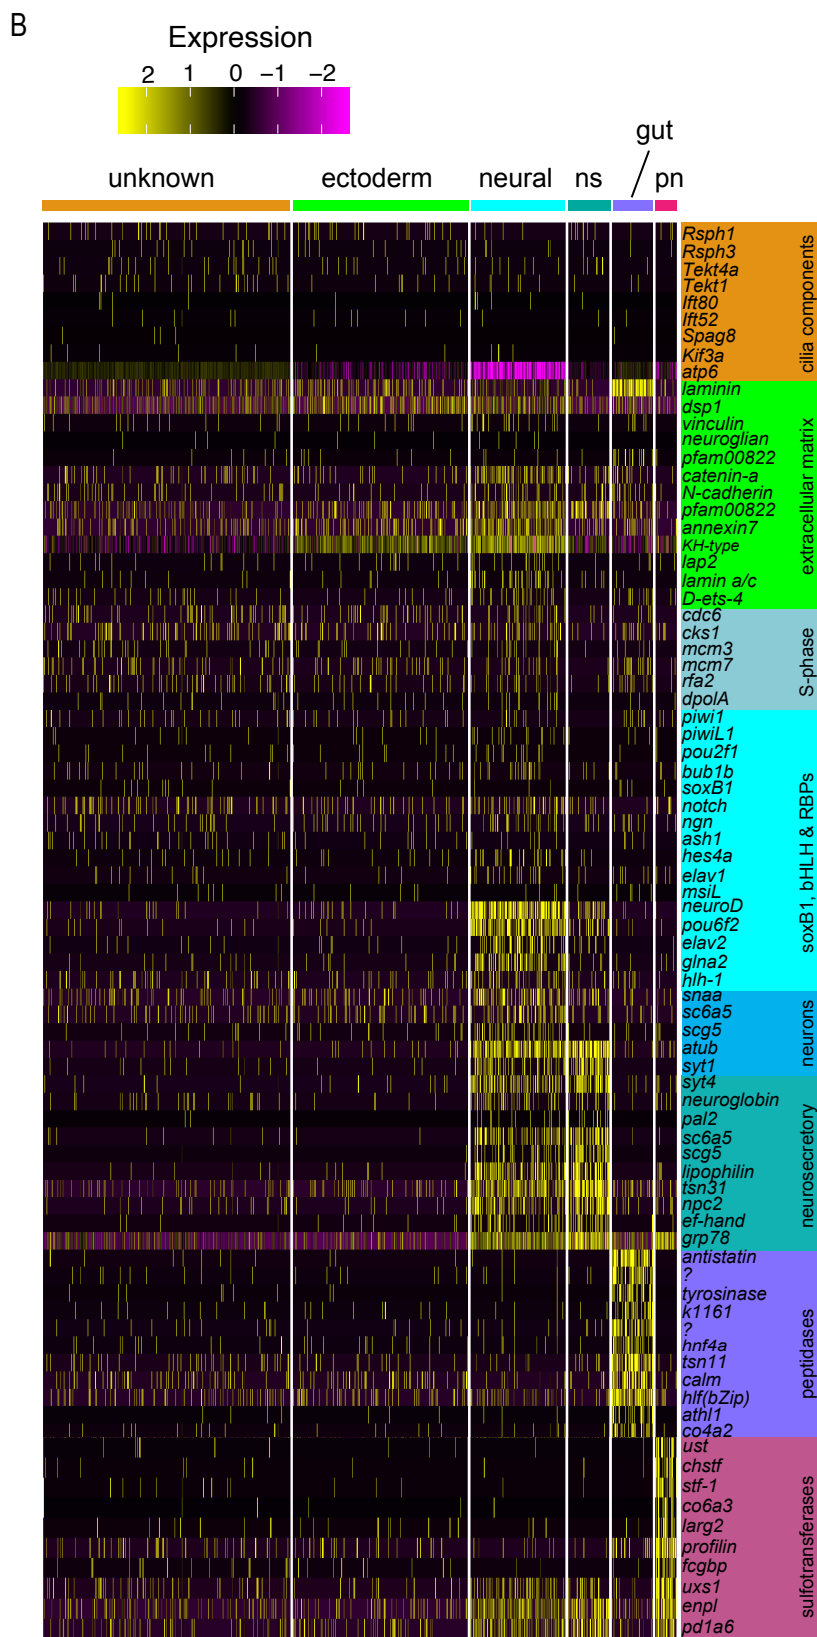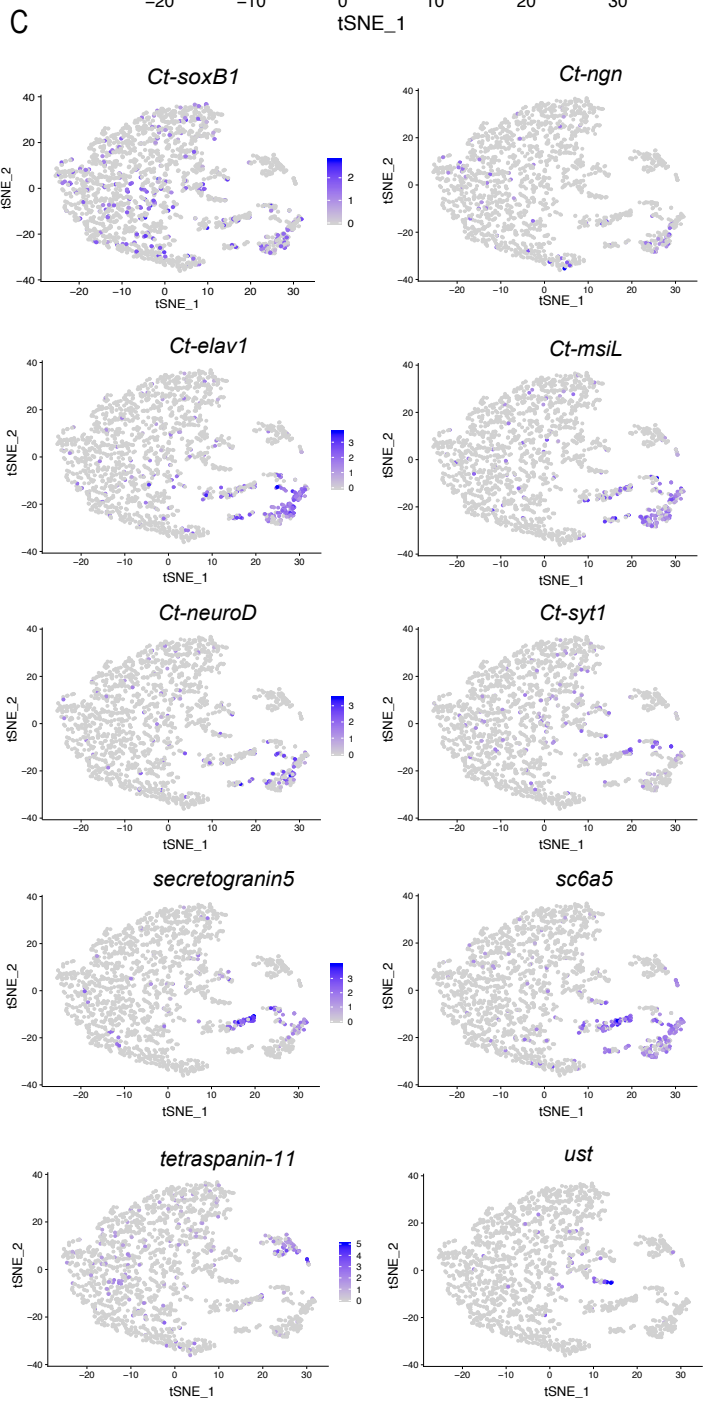

A

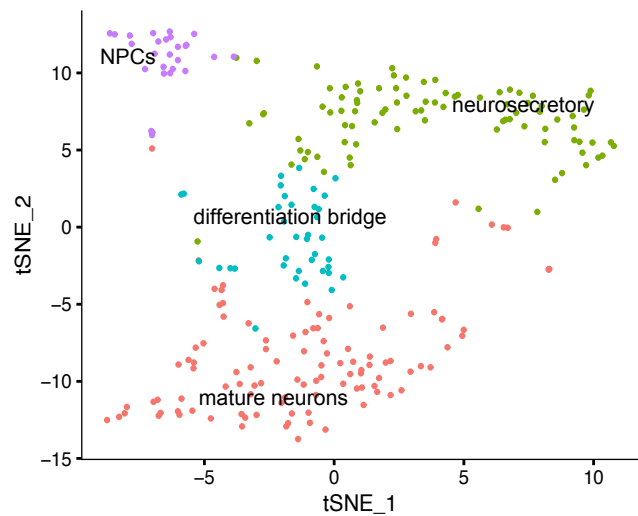

B

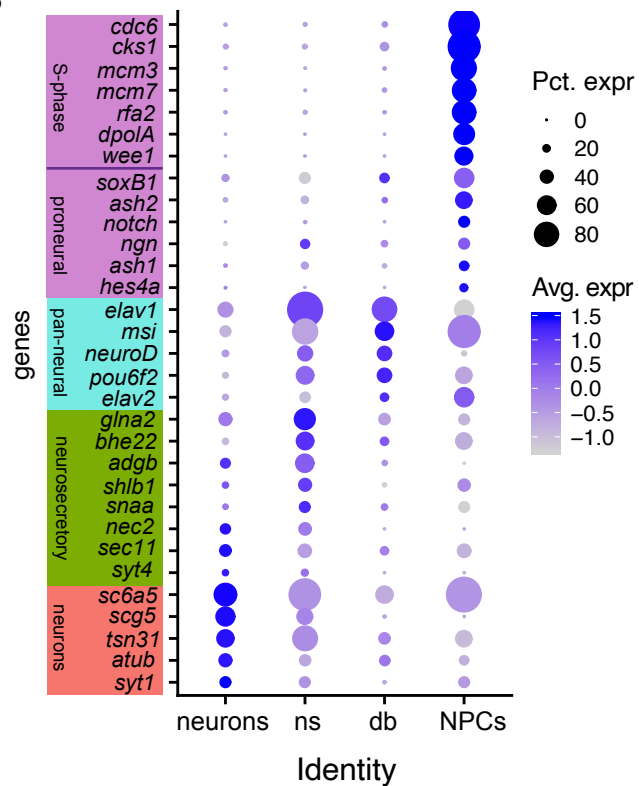

C

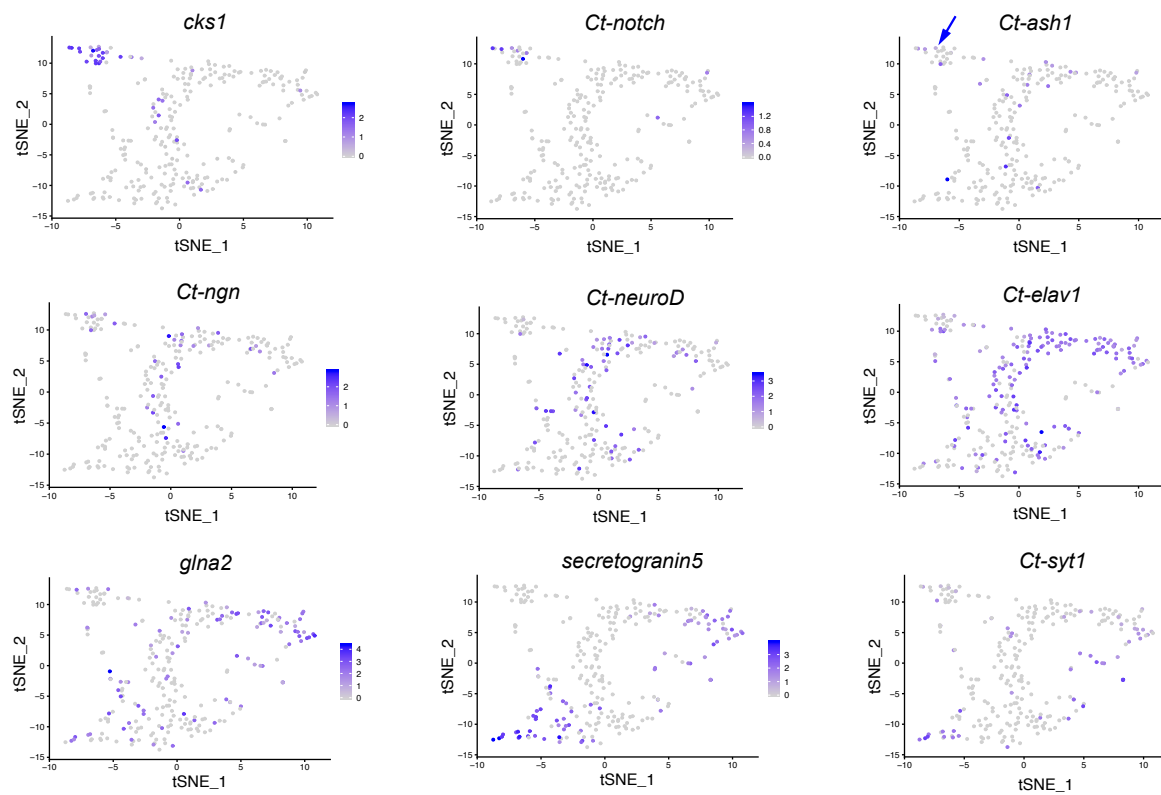

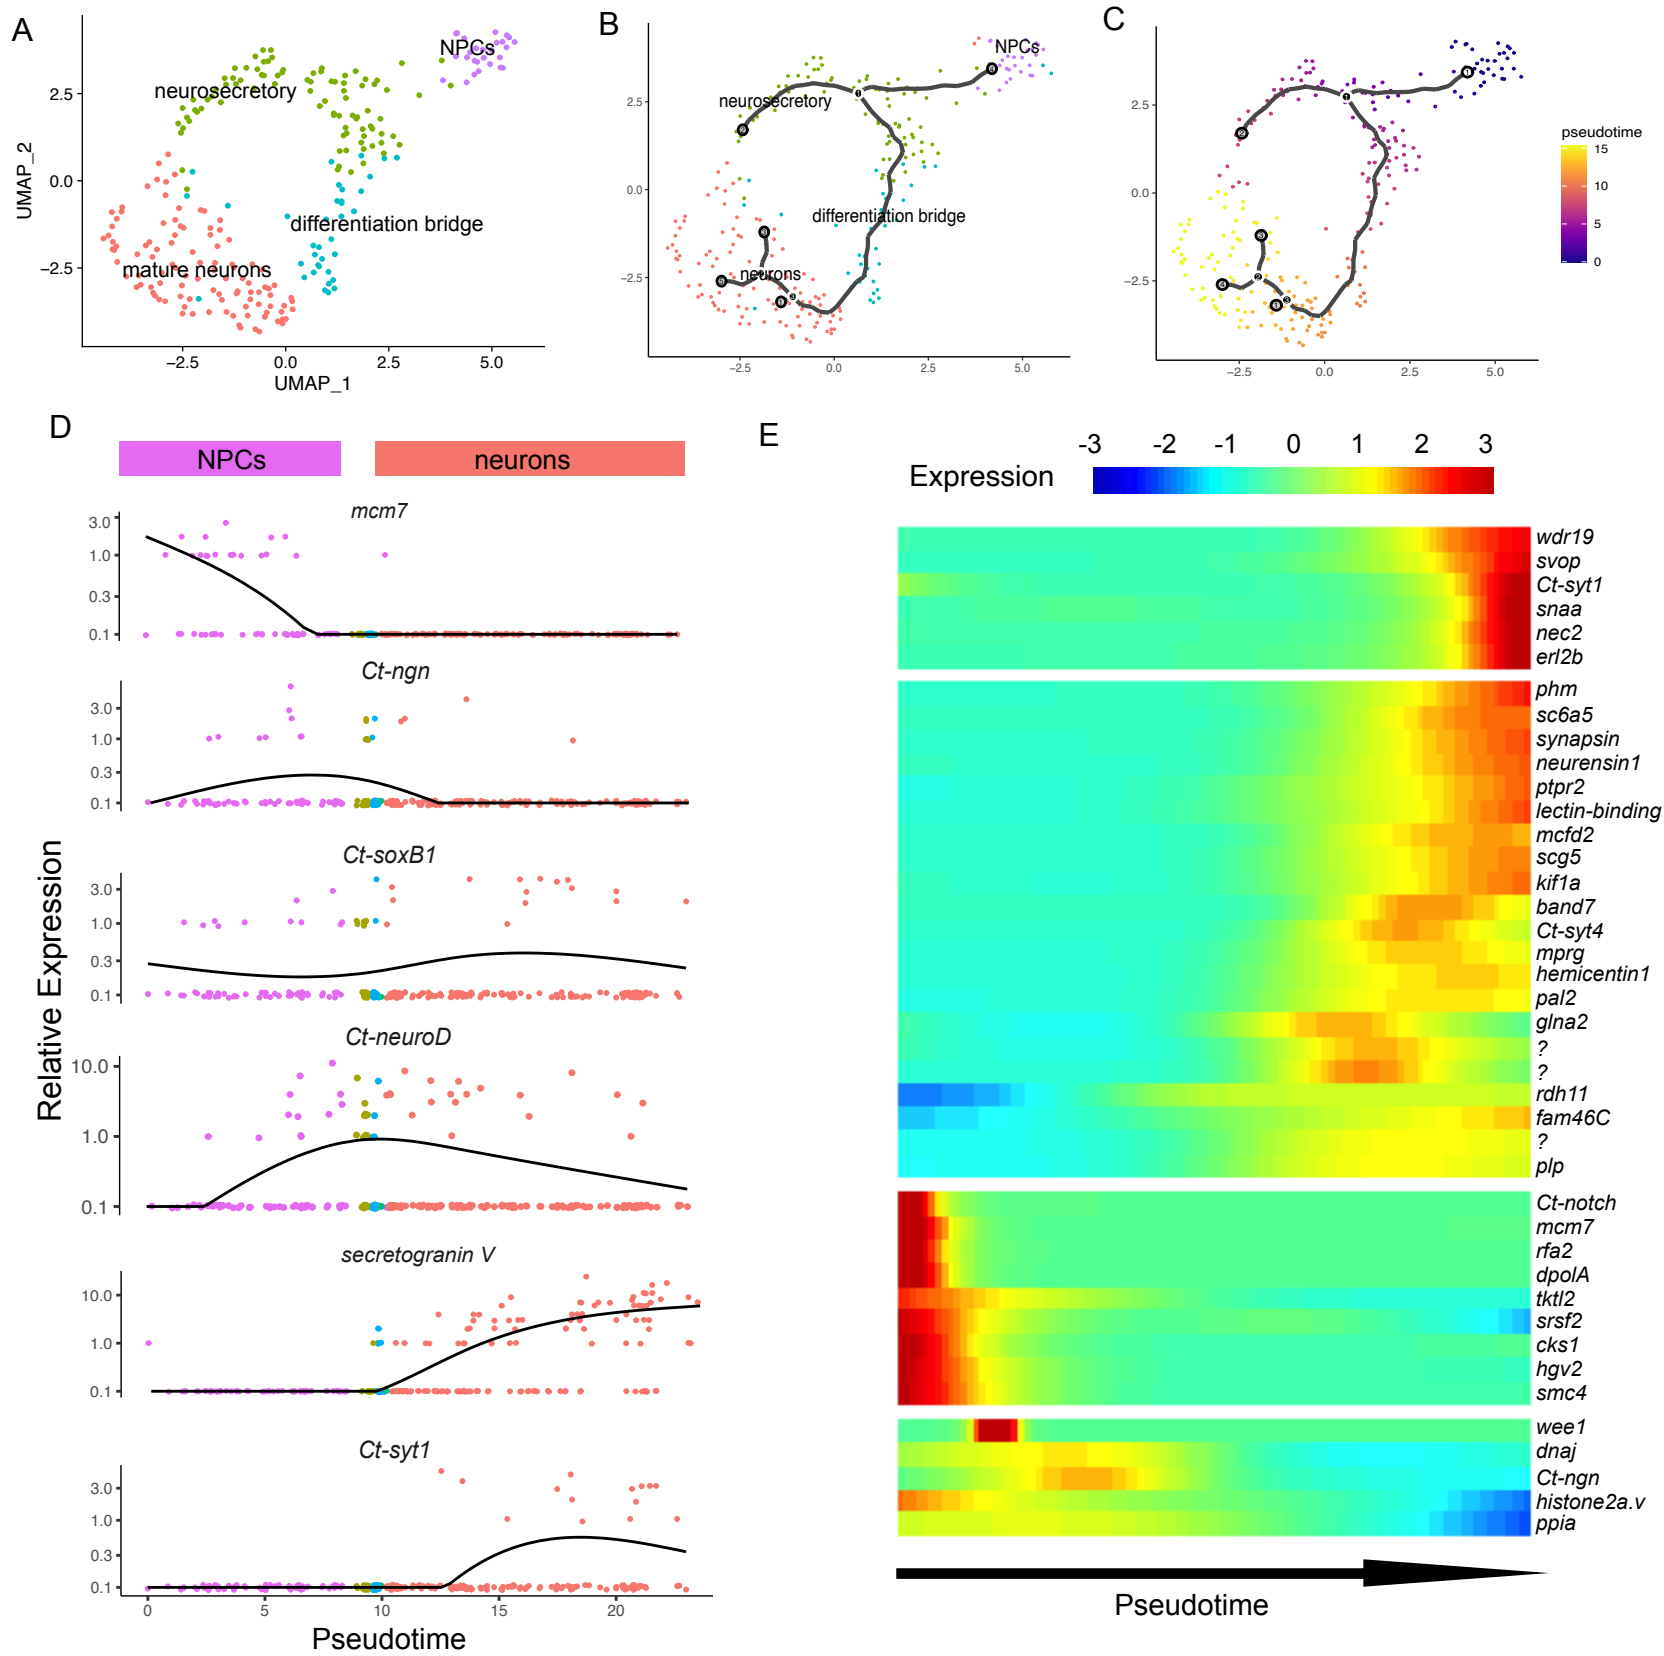

A

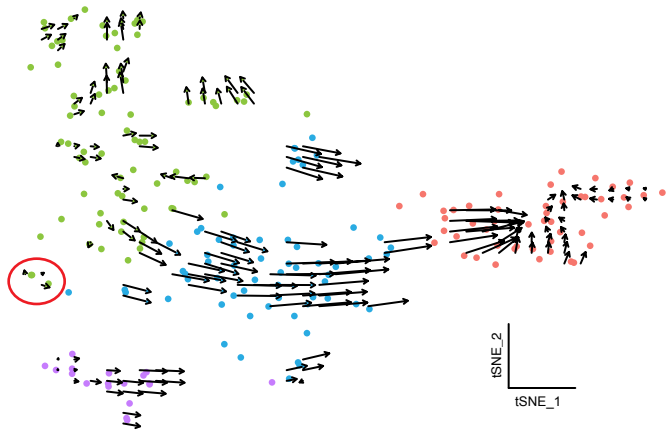

B

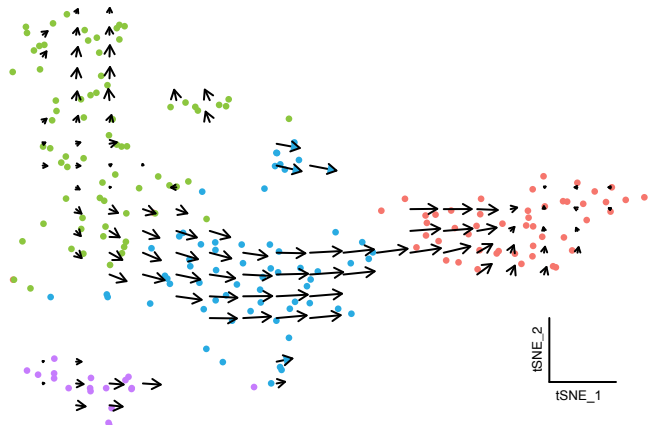

Source: https://www.biorxiv.org/content/10.1101/2020.10.16.342709v1.full.pdf
